# Supplementary material for: Deficiency and excess of groundwater iodine and their health associations
Source: Springer Nature journal article supplement (doi:10.1038/s41467-022-35042-6), 2022-11-29
Supplement: MOESM1 [file 41467_2022_35042_MOESM1_ESM.pdf]

Supplementary Information for:

**Deficiency and excess of groundwater iodine and their health associations**

Ruoqi Ma<sup>1,2,3</sup>, Mingquan Yan<sup>1</sup>, Peng Han<sup>1</sup>, Ting Wang<sup>1,4</sup>, Bin Li<sup>1,4</sup>, Shungui Zhou<sup>5</sup>, Tong  
Zheng<sup>1</sup>, Yandi Hu<sup>1</sup>, Alistair G. L. Borthwick<sup>6,7</sup>, Chunmiao Zheng<sup>8</sup>, Jinren Ni<sup>1,2,\*</sup>

\*Correspondence to: Jinren Ni, College of Environmental Sciences and Engineering,

Peking University, Beijing 100871, P. R. China

E-mail addresses: [jinrenni@pku.edu.cn](mailto:jinrenni@pku.edu.cn) (J.R. Ni)

**This Supplementary Information contains:**

- Glossary (page 2)
- Supplementary Figures 1 ~ 13 (page 3 ~ 21)
- Supplementary Tables 1 ~ 19 (page 22 ~ 49)
- Supplementary References (page 50 ~ 51)

## 15    **Glossary**

16    *Reduction iodine*: iodide ( $I^-$ ), reduction state of iodine in the hydro-biogeochemical  
17    cycle.

18    *Oxidation iodine*: iodate ( $IO_3^-$ ) and organo-iodine, oxidation state of iodine in the  
19    hydro-biogeochemical cycle.

20    *Porewater*: water stored in the compressible sediments, which could be released into  
21    adjacent aquifers in the process of sediment compaction.

22    *Iodine enrichment ratio*: an index used to evaluate the level of iodine released from  
23    the solid to the aqueous phase, and defined as iodide/chloride ( $I^-/Cl^-$ ) in groundwater.

24    *Risk index of iodine deficiency ( $R_D$ )*: evaluation index of non-carcinogenic risks  
25    response to iodine deficiency, which is equal numerically to the reciprocal of iodine-  
26    deficient hazard quotient.

27    *Risk index of iodine excess ( $R_E$ )*: evaluation index of non-carcinogenic risks response  
28    to iodine excess, which is equal numerically to the iodine-excess hazard quotient.

29    **Supplementary Figures**

30    **Supplementary Fig. 1** | Sampling sites of groundwater in 686 monitoring wells

31    throughout China

32    **Supplementary Fig. 2** | Distribution characteristics of iodine in groundwater

33    throughout China

34    **Supplementary Fig. 3** | Time series of annual groundwater storage accumulation

35    (1971 ~ 2016) in seven geo-environmental zones of China

36    **Supplementary Fig. 4** | Summary of previous conceptual models for iodine

37    enrichment and transformation in groundwater

38    **Supplementary Fig. 5** | Spatial distribution of total iodine content and its species in

39    groundwater throughout China

40    **Supplementary Fig. 6** | Distribution characteristics of groundwater iodine species

41    **Supplementary Fig. 7** | Relationships between prevalence of thyroid diseases and

42    iodine nutrient levels

43    **Supplementary Fig. 8** | Comparison of daily iodine intake from drinking water and

44    iodized salt

45    **Supplementary Fig. 9** | Health risks posed by total groundwater iodine in seven geo-

46    environmental zones

- 47    **Supplementary Fig. 10** | Distribution of drinking water iodine based on the national  
48    survey data from National Health Commission of P.R. China
- 49    **Supplementary Fig. 11** | Spatial response of thyroid risks to groundwater iodine  
50    speciation at provincial level in China
- 51    **Supplementary Fig. 12** | Optimal iodine provision in Scenario 2 (Case 1)
- 52    **Supplementary Fig. 13** | Optimal iodine provision in Scenario 3 (Case 1)

## Sampling sites (686)

Newly constructed wells (575)

● Phreatic water (410)

● Confined water (165)

Reconstructed wells (111)

+ Phreatic water (52)

+ Confined water (59)

## Geo-environmental zones

— Primary partition

I: Northeast Plain-Mountain Zone

II: Huanghuaihai-Yangtze River Delta Plain Zone

III: South China Bedrock Foothill Zone

IV: Northwest Loess Plateau Zone

V: Southwest China Karst Rock Mountain Zone

VI: Northwest Arid Desert Zone

VII: Qinghai-Tibet Plateau Alpine Frozen Soil Zone

— Secondary partition

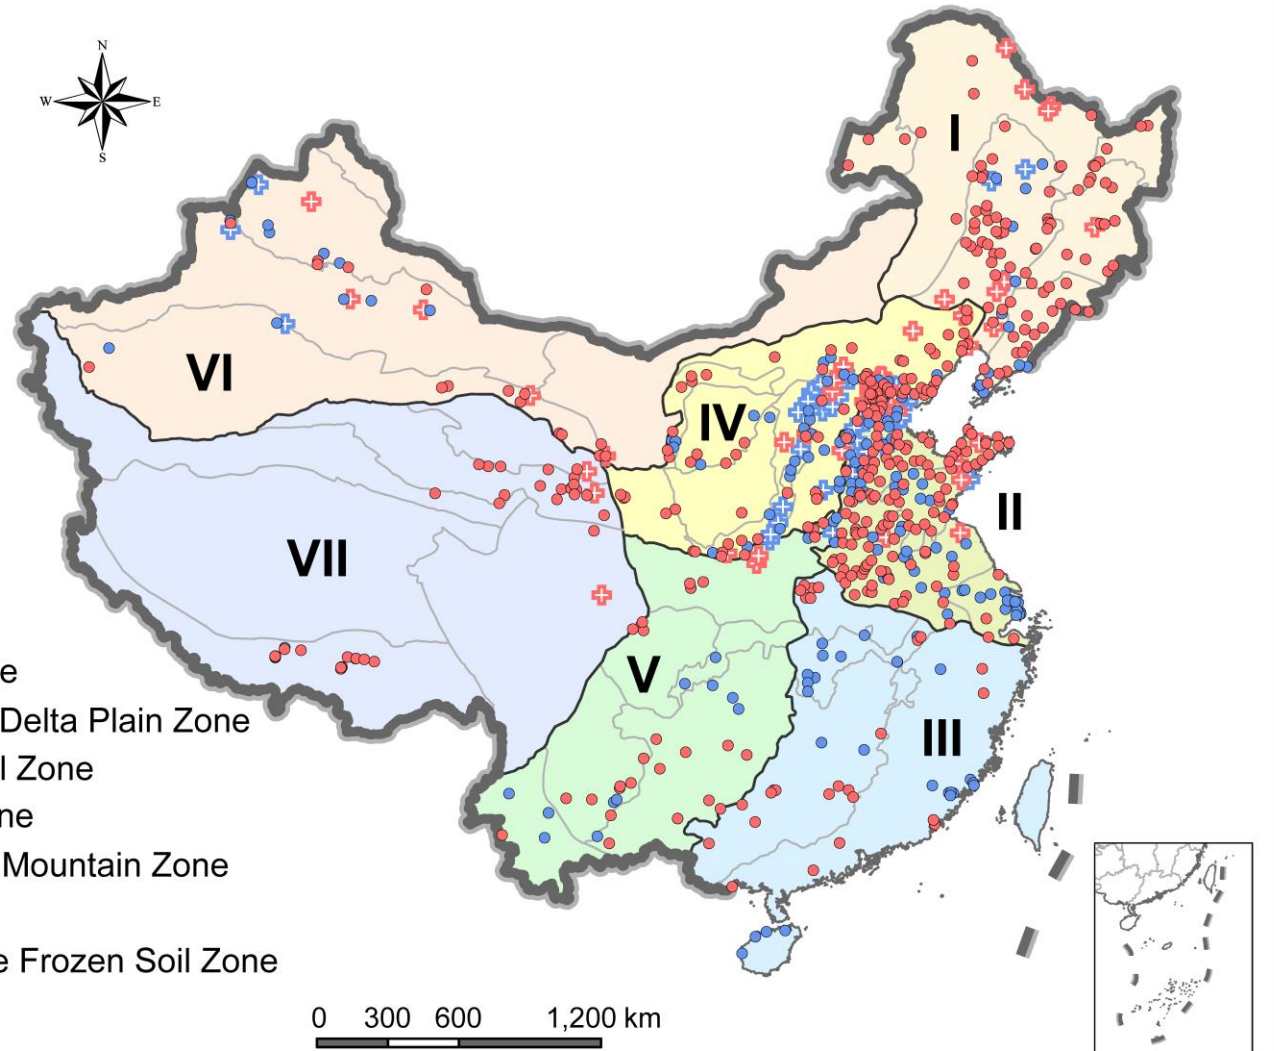

54 **Supplementary Fig. 1 | Sampling sites of groundwater in 686 monitoring wells throughout China.** Circular and hollow crosses indicate  
55 samples from newly constructed and reconstructed wells. Red and blue dots represent phreatic and confined water samples. China's geo-  
56 environmental zones are shaded in different colors on national map, namely: Northeast Plain-Mountain Zone (I), Huanghuaihai-Yangtze River  
57 Delta Plain Zone (II), South China Bedrock Foothill Zone (III), Northwest Loess Plateau Zone (IV), Southwest China Karst Rock Mountain  
58 Zone (V), Northwest Arid Desert Zone (VI), and Qinghai-Tibet Plateau Alpine Frozen Soil Zone (VII).

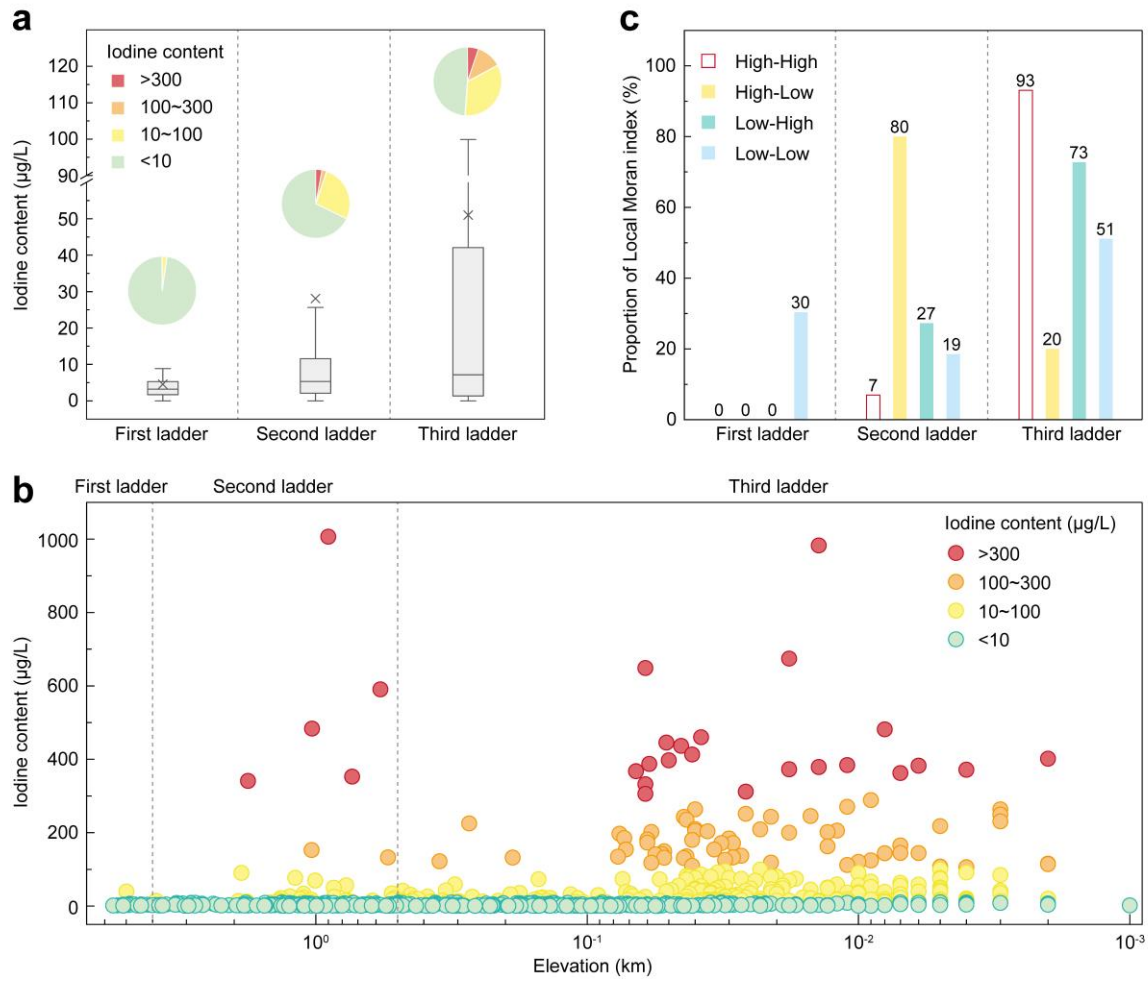

**Supplementary Fig. 2 | Distribution characteristics of iodine in groundwater throughout**

**China. a**, Pie charts and box plots indicating distribution of groundwater iodine content in three topographic ladders of China (n = 686). The box is bounded by the first and the third quartile with a horizontal line at the median and a cross at the mean, and whiskers extend to the maximum and minimum value in 1.5 times interquartile range. **b**, Variation in groundwater iodine content with elevation above mean sea level. **c**, Histograms showing proportions of different Local Moran Indexes (with 1200 km threshold distance) in three topographic ladders.

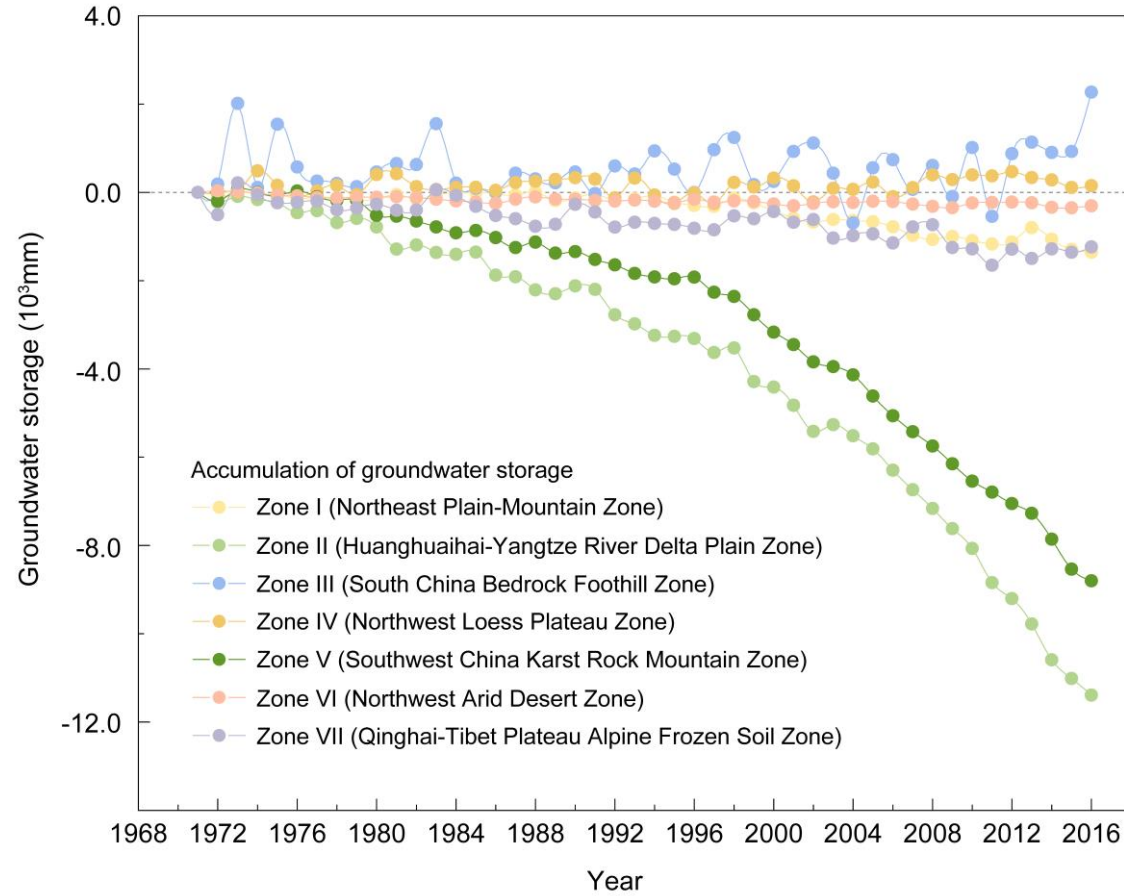

68

69 **Supplementary Fig. 3 | Time series of annual groundwater storage accumulation (1971 ~ 2016) in seven geo-environmental zones of China.**



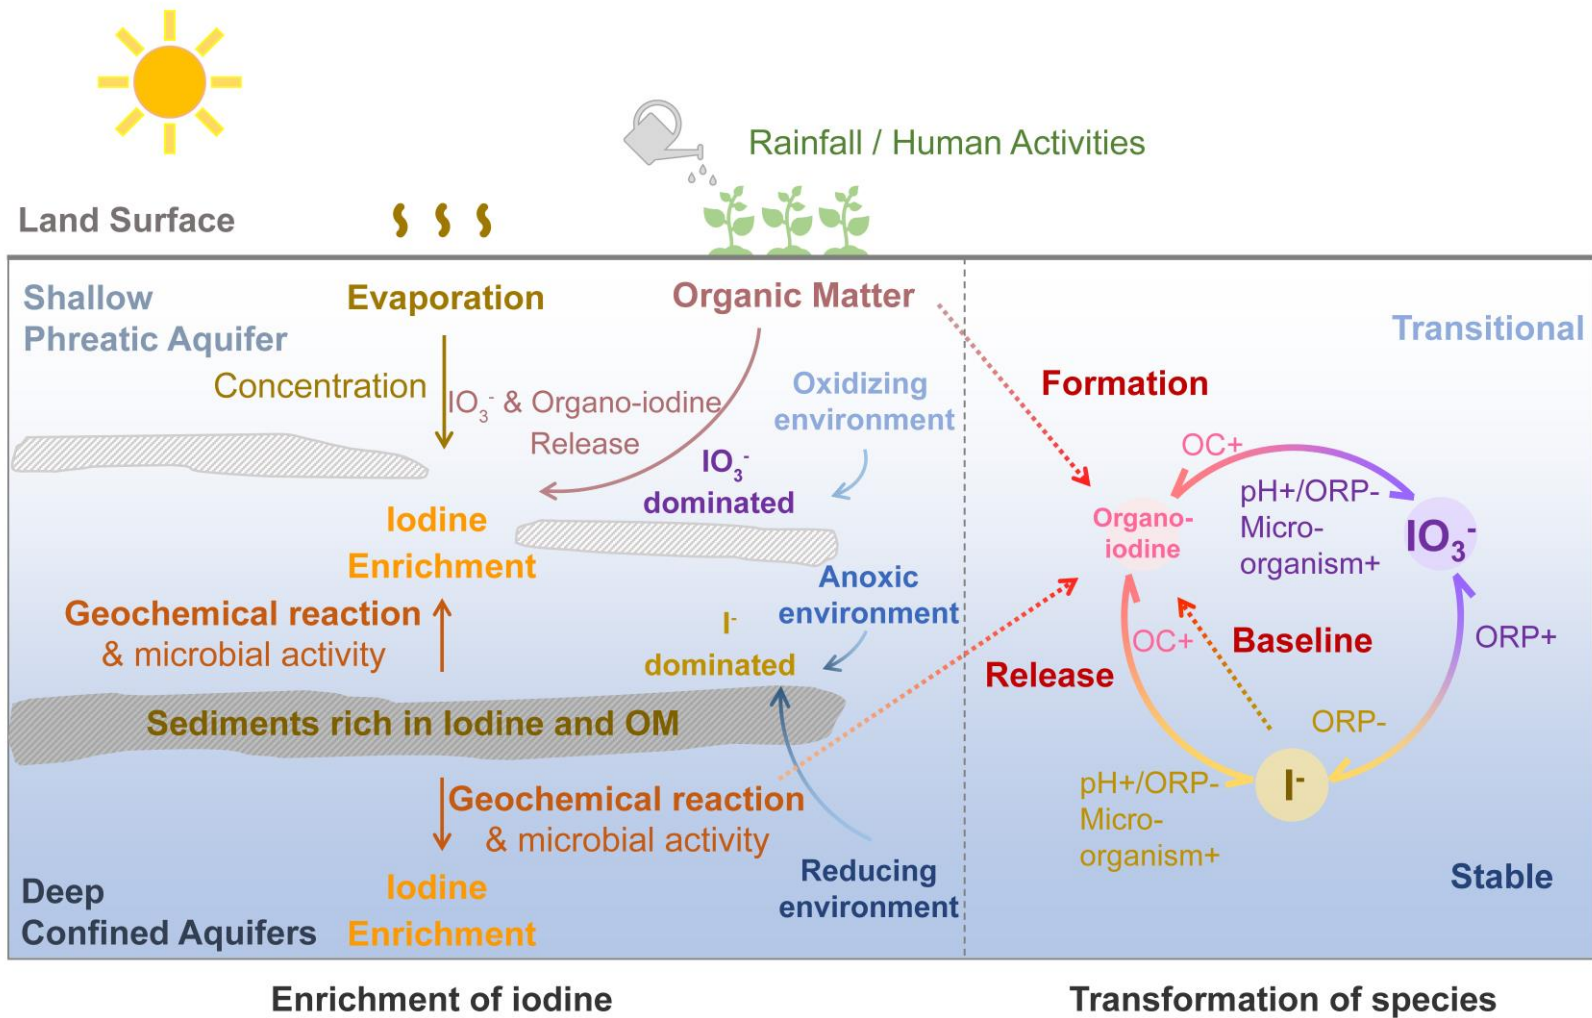

70

71 **Supplementary Fig. 4 | Summary of previous conceptual models for iodine enrichment and transformation in groundwater<sup>1-5</sup>.**

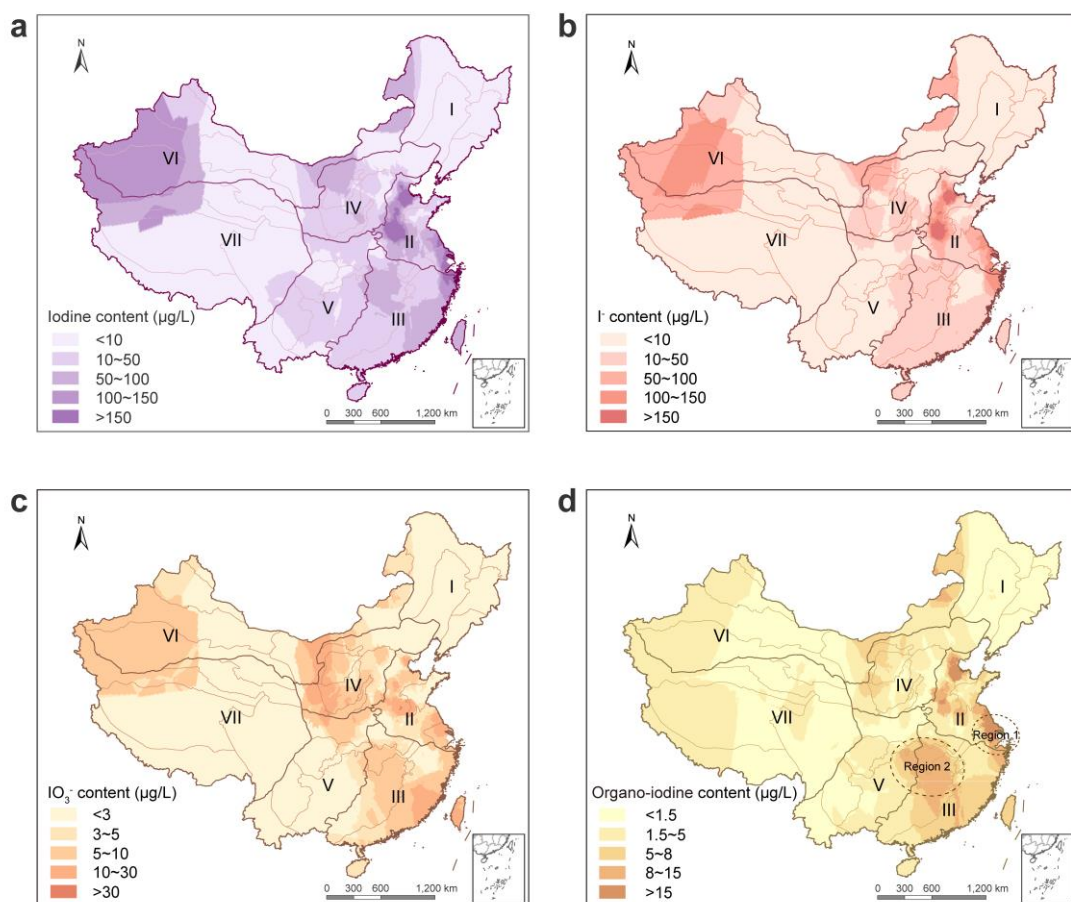

**Supplementary Fig. 5 | Spatial distribution of total iodine content and its species in groundwater throughout China. a, Total iodine. b, Iodide. c, Iodate. d, Organo-iodine. Regions marked by dotted lines in (d) are the Yangtze River Delta Plain (Region 1) and the Lianghu Plain (Region 2).**

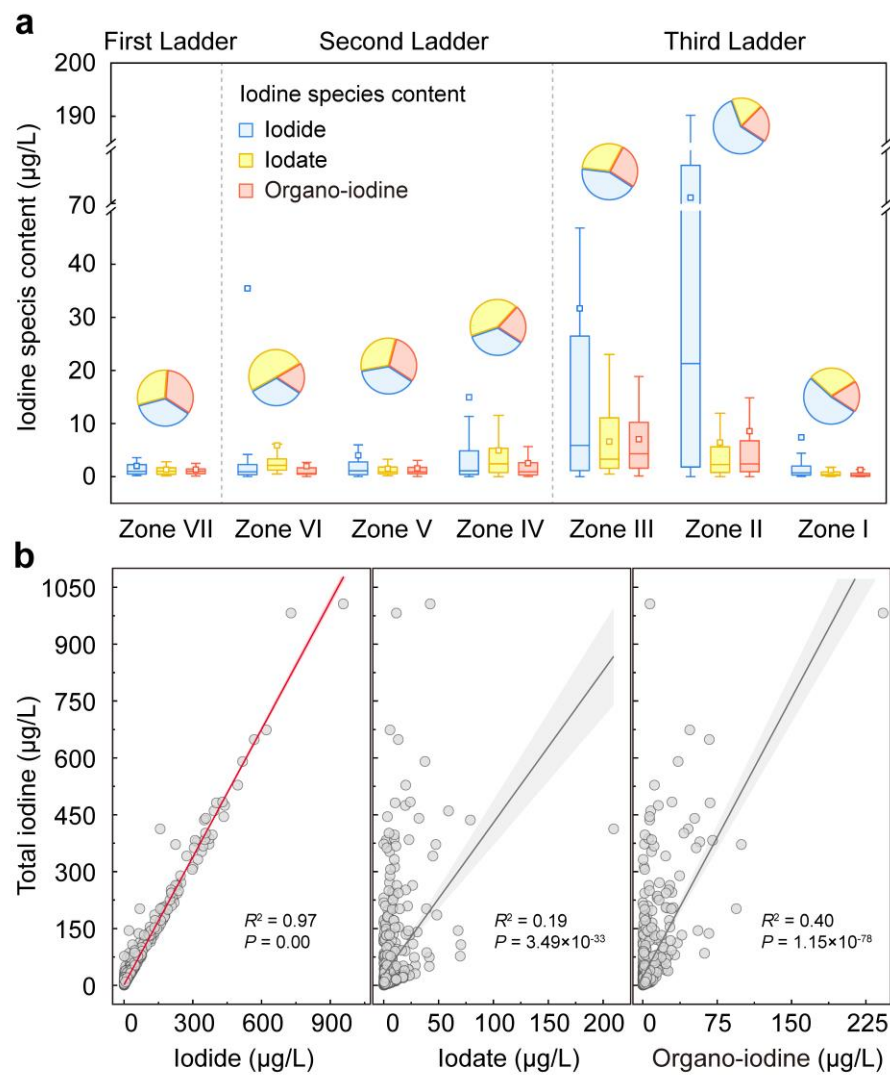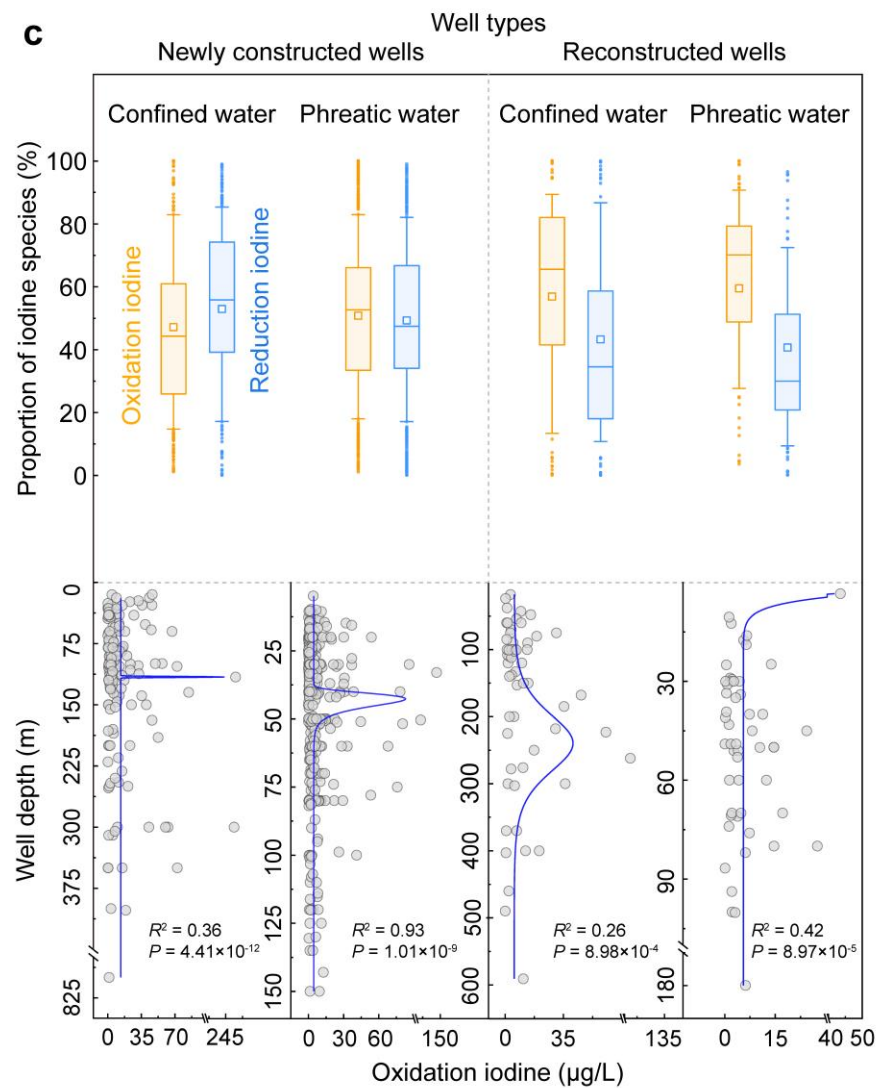

78 **Supplementary Fig. 6 | Distribution characteristics of groundwater iodine species.** **a**, Pie charts and box plots indicating distribution of  
79 iodine species ( $\text{I}^-$ ,  $\text{IO}_3^-$  and organo-iodine) in the seven geo-environmental zones of China ( $n = 686$ ). The box is bounded by the first and the third  
80 quartile with a horizontal line at the median and a hollow square at the mean, and whiskers extend to the maximum and minimum value in 1.5  
81 times interquartile range. **b**, Correlations between three iodine species and total iodine content (two-sided  $t$ -test). The pink line (or shade) and  
82 grey lines (or shades) are regression lines (or the 95% prediction intervals) of total iodine and different iodine species contents. **c**, Proportions of  
83 iodine species ( $\text{I}^-$ : reduction iodine,  $\text{IO}_3^-$  and organo-iodine: oxidation iodine) and variations in oxidation iodine content with well depth for  
84 different types of groundwater ( $n = 686$ , two-sided  $F$ -test). The box is bounded by the 35% and the 65% quartile with a horizontal line at the  
85 median and a hollow square at the mean, and whiskers extend to the maximum and minimum value in the range of 20% to 80% quartile.

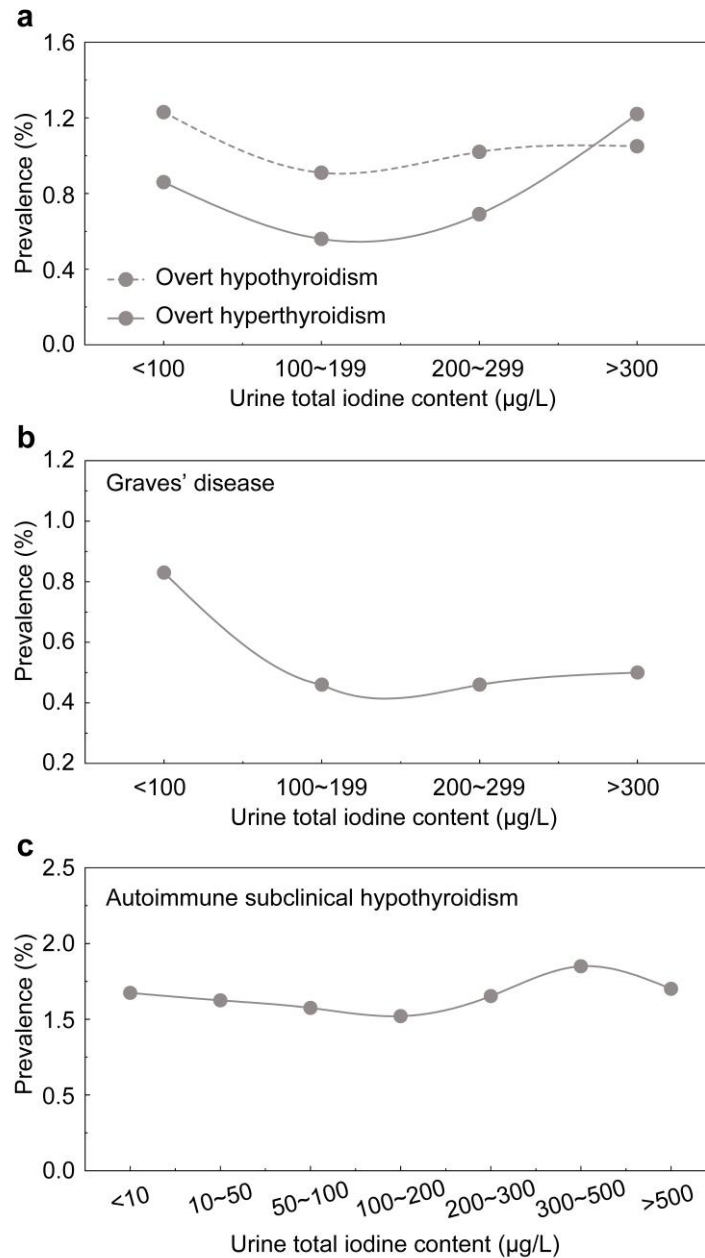

86

87 **Supplementary Fig. 7 | Relationships between prevalence of thyroid diseases and iodine**

88 **nutrient levels**<sup>6</sup>. **a**, Prevalence of overt hypothyroidism and hyperthyroidism. **b**, Prevalence of

89 Graves' disease. **c**, Prevalence of autoimmune subclinical hypothyroidism.

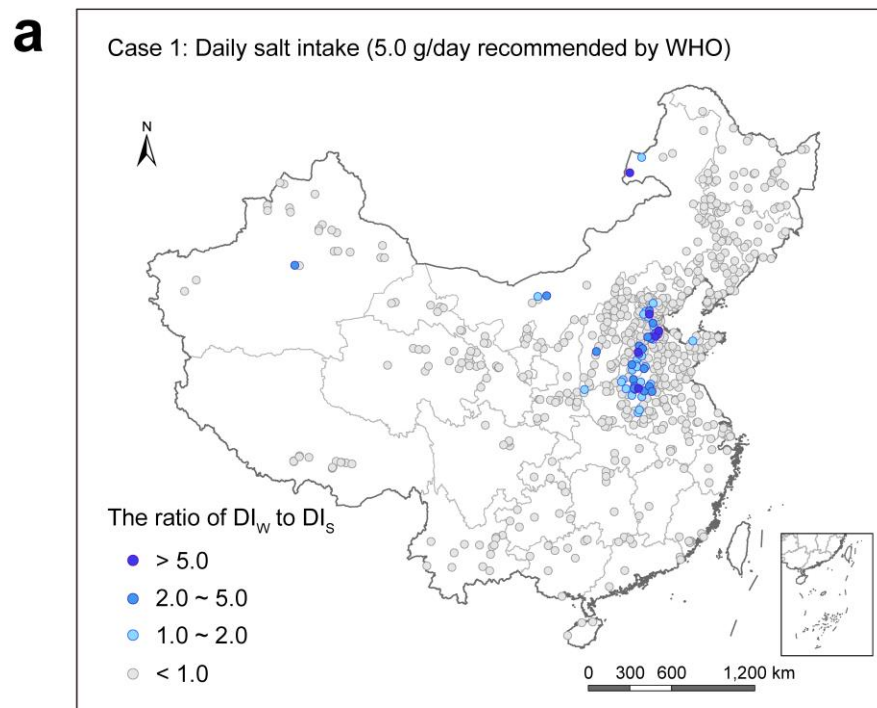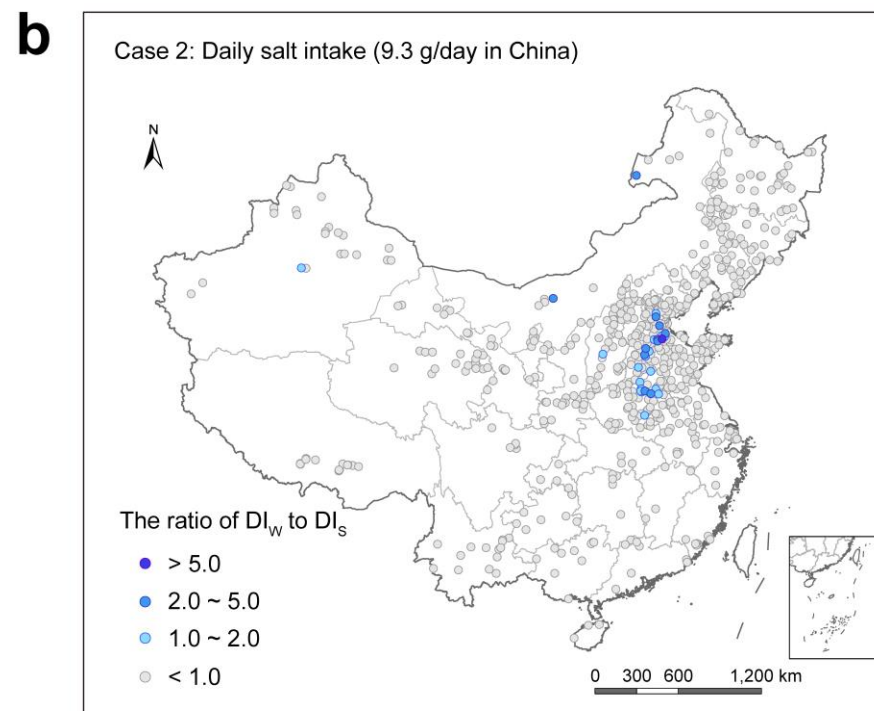

90

91 **Supplementary Fig. 8 | Comparison of daily iodine intake from drinking water and iodized salt. a**, Case 1 represents daily salt intake (5.0

92 g/day) recommended by World Health Organization (WHO). **b**, Case 2 represents daily salt intake (9.3 g/day) in China.



**a**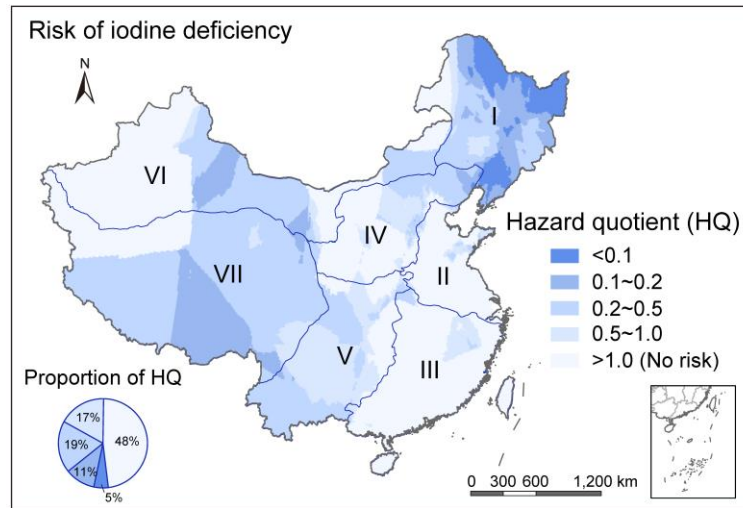**b**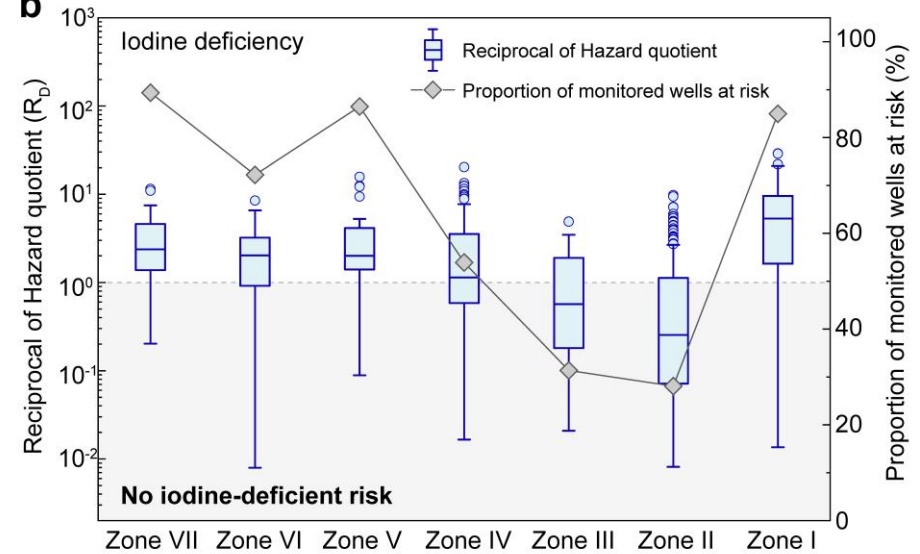**c**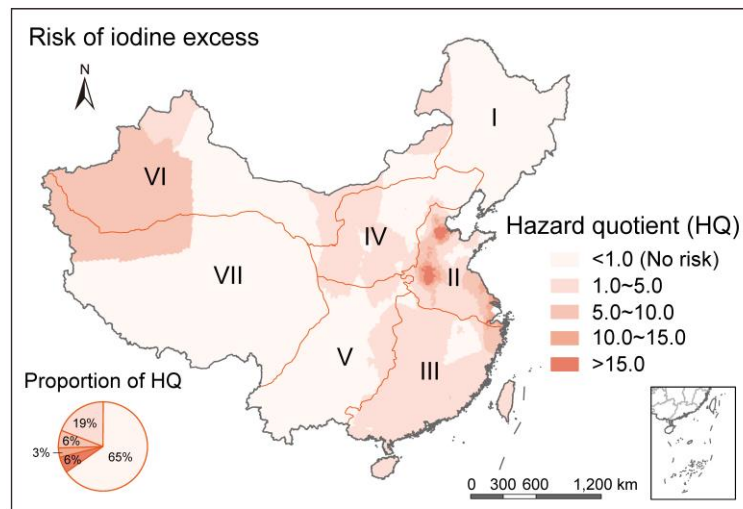**d**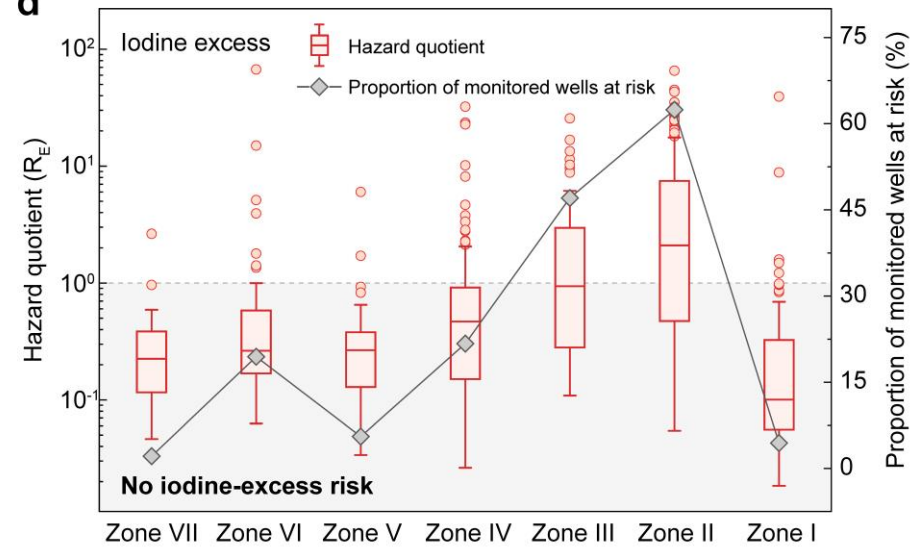

94 **Supplementary Fig. 9 | Health risks posed by total groundwater iodine in seven geo-environmental zones. a**, Spatial distribution of iodine-  
95 deficient hazard quotient throughout China. **b**, Box plots showing groundwater iodine deficiency risk in the seven geo-environmental zones,  
96 expressed using the reciprocal of hazard quotient ( $R_D$ ) ( $n = 686$ ). **c**, Spatial distribution of iodine-excess hazard quotient. **d**, Box plots showing  
97 groundwater iodine excess risk ( $R_E$ ) in the seven geo-environmental zones ( $n = 686$ ). Gray areas in **(b)** and **(d)** represent no iodine deficiency or  
98 excess risk. The box in **(b)** and **(d)** is bounded by the first and the third quartile with a horizontal line at the median, and whiskers extend to the  
99 maximum and minimum value in 1.5 times interquartile range.



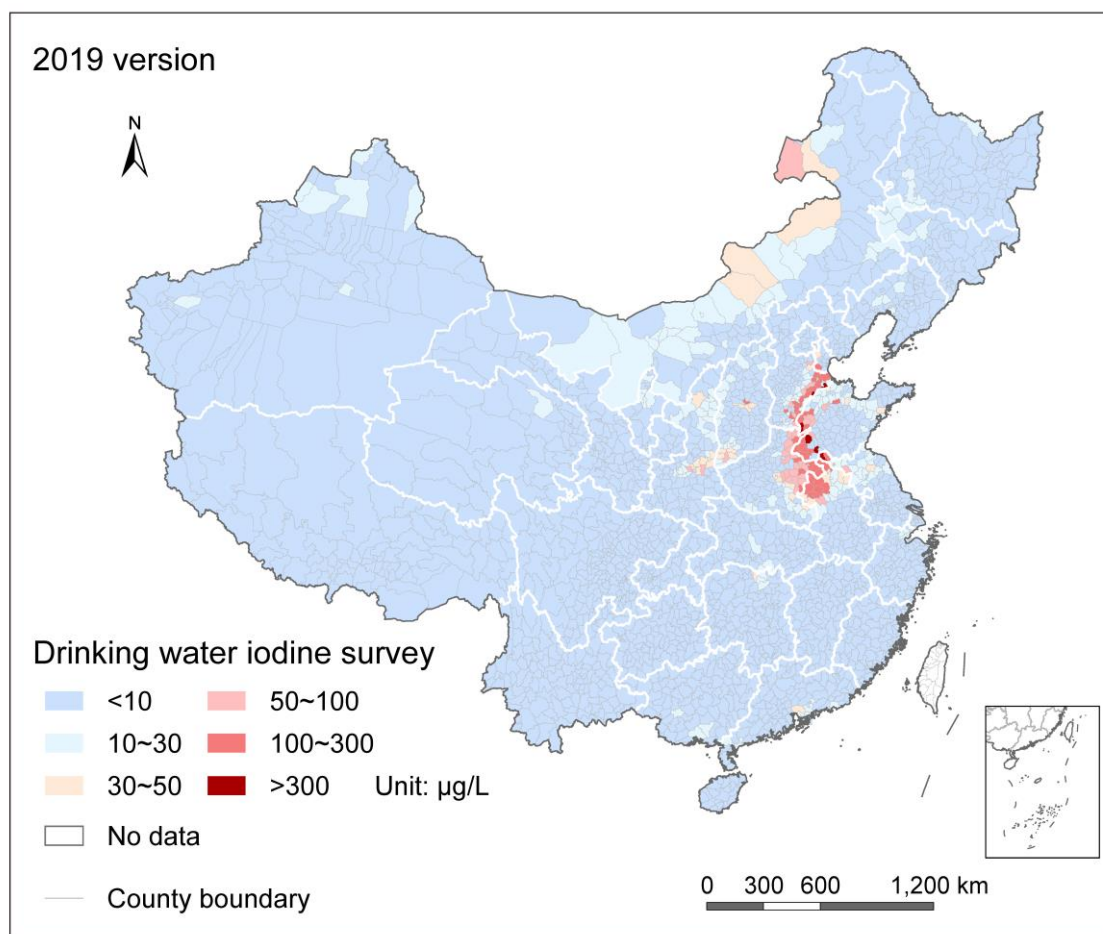

100

101 **Supplementary Fig. 10 | Distribution of drinking water iodine based on the**  
 102 **national survey data from National Health Commission of P.R. China<sup>7</sup>.**

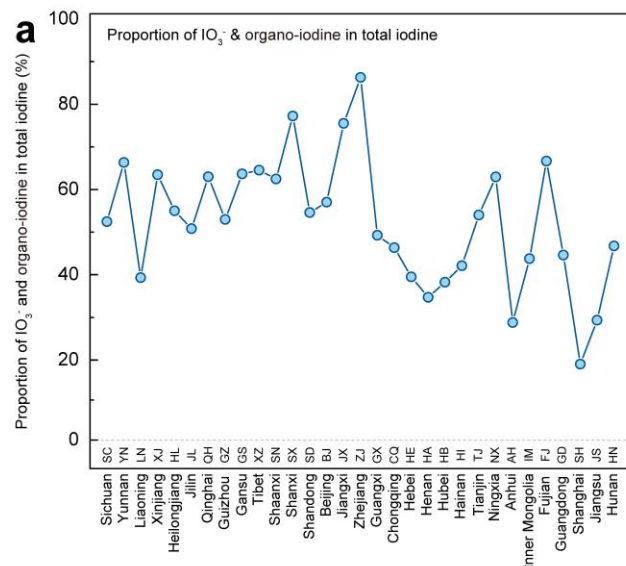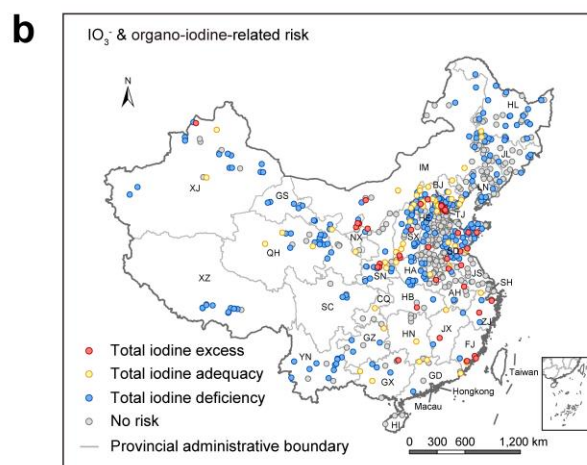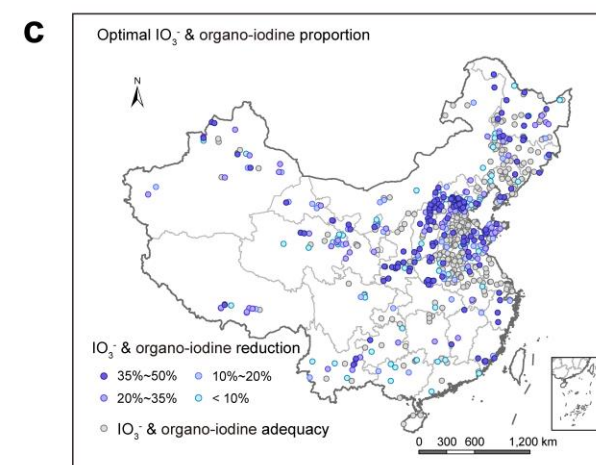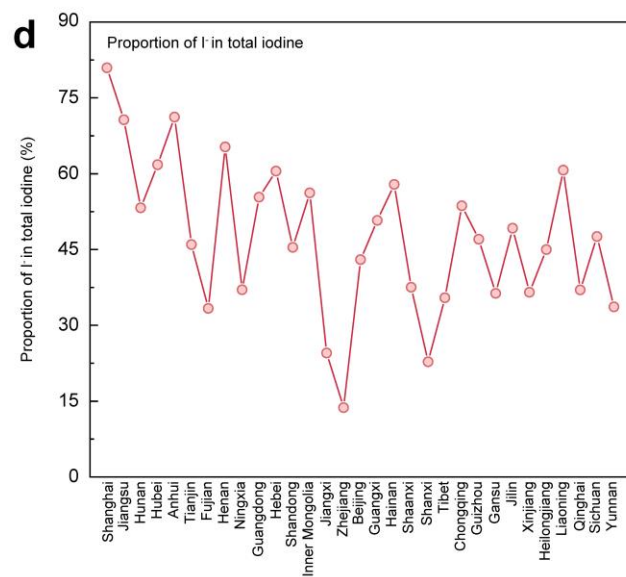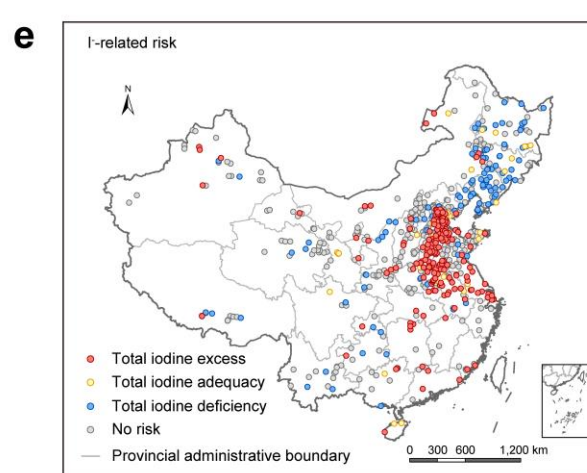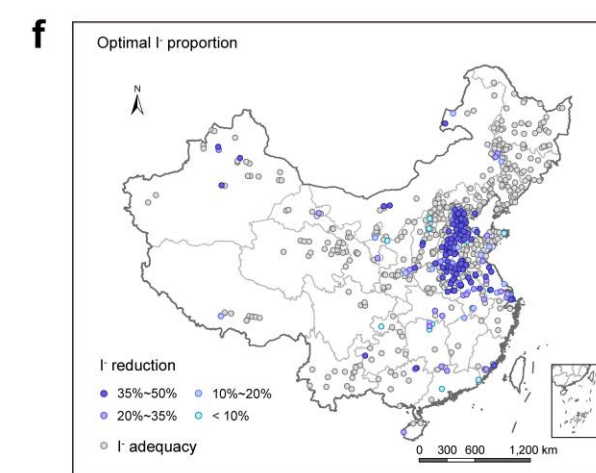

104 **Supplementary Fig. 11 | Spatial response of thyroid risks to groundwater iodine speciation at provincial level in China.** **a**, Proportions of  
105 oxidation iodine ( $\text{IO}_3^-$  and organo-iodine) in total iodine at provincial level. **b**, Thyroid risks response to  $\text{IO}_3^-$  and organo-iodine in groundwater  
106 iodine (with proportion of  $\text{IO}_3^-$  and organo-iodine in total iodine  $> 50\%$ ). **c**, Optimal  $\text{IO}_3^-$  and organo-iodine proportion corresponding to  
107 tolerable thyroid risks. **d**, Proportions of reduction iodine ( $\text{I}^-$ ) in total iodine at provincial level. **e**, Thyroid risks response to  $\text{I}^-$  in groundwater  
108 iodine (with proportion of  $\text{I}^-$  in total iodine  $> 50\%$ ). **f**, Optimal  $\text{I}^-$  proportion corresponding to tolerable thyroid risks.

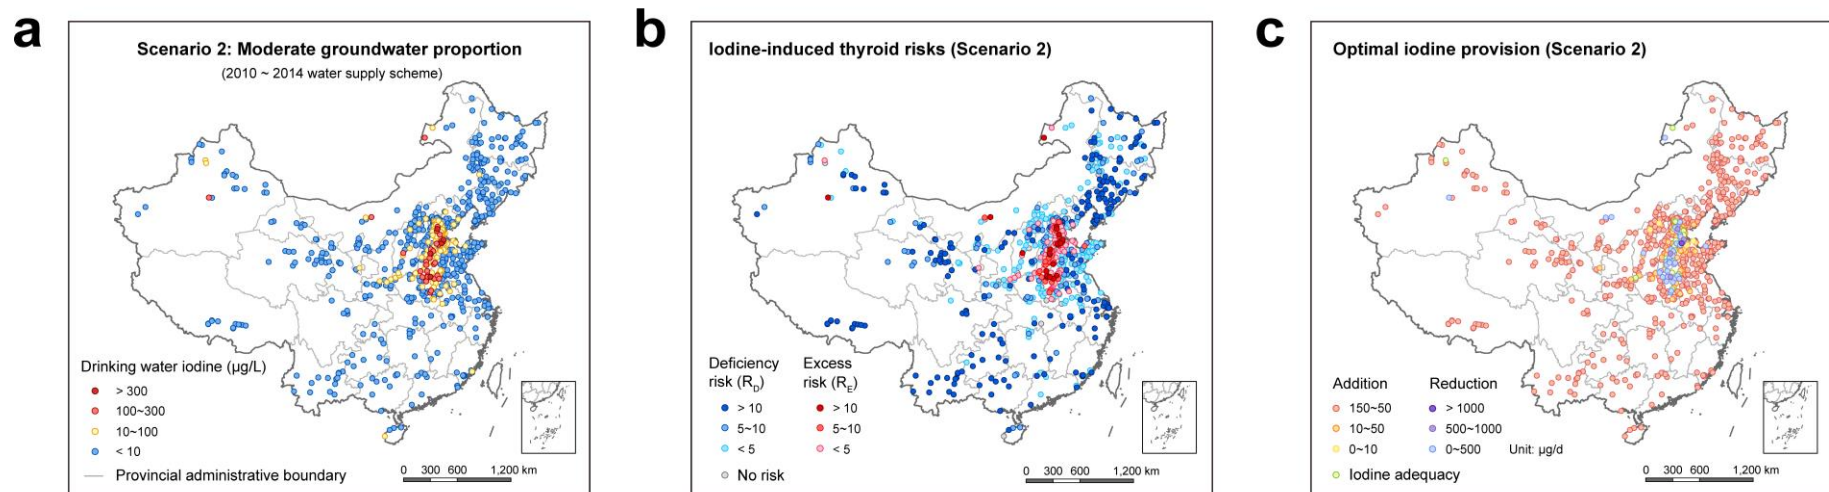

109

110 **Supplementary Fig. 12 | Optimal iodine provision in Scenario 2 (Case 1).** **a**, Scenario 2 represents groundwater as a partial source in drinking

111 water utilization according to the water supply scheme (2010 ~ 2014). **b**, Iodine-induced thyroid risks under Scenario 2. **c**, Optimal iodine provision

112 for reducing thyroid risks under Scenario 2.

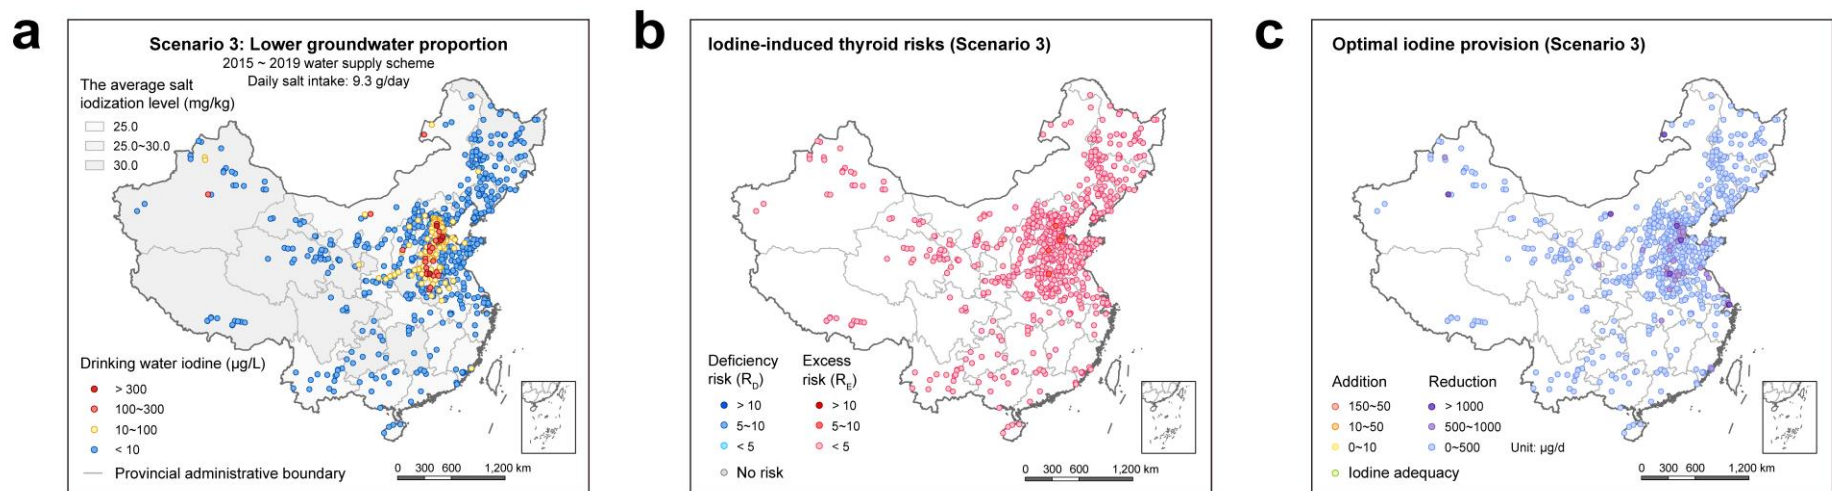

113

114 **Supplementary Fig. 13 | Optimal iodine provision in Scenario 3 (Case 1).** **a**, Scenario 3 represents groundwater as a partial source in drinking

115 water utilization with consideration of iodized salt supply (daily salt intake 9.3 g/day) in the total dietary iodine intake. **b**, Iodine-induced thyroid

116 risks under Scenario 3. **c**, Optimal iodine provision for reducing thyroid risks under Scenario 3.

117    **Supplementary Tables**

118    **Supplementary Table 1** | Information on groundwater sampling sites

119    **Supplementary Table 2** | Contents of groundwater iodine and its species in different  
120    geo-environmental zones of China

121    **Supplementary Table 3** | Hydrochemistry composition of groundwater in Zones I  
122    and II

123    **Supplementary Table 4** | Temporal variation of groundwater storage accumulation in  
124    Zones I and II (1971 ~ 2016)

125    **Supplementary Table 5** | Annual water supply volume ( $\times 10^8 \text{ m}^3$ ) of main provinces  
126    involved in Zone I

127    **Supplementary Table 6** | Annual water supply volume ( $\times 10^8 \text{ m}^3$ ) of main provinces  
128    involved in Zone II

129    **Supplementary Table 7** | Annual groundwater resource volumes ( $\times 10^8 \text{ m}^3$ ) of main  
130    provinces involved in Zone I and Zone II

131    **Supplementary Table 8** | Proportions of iodine species in different groundwater types

132    **Supplementary Table 9** | Mean and 95th percentile values of hazard quotient (HQ)  
133    via drinking water consumption

134 **Supplementary Table 10** | Iodine state and thyroid nodules prevalence in 36 cities  
135 from 31 provinces of China

136 **Supplementary Table 11** | Proportion of monitored wells at iodine-induced risk at  
137 provincial level in China

138 **Supplementary Table 12** | Median groundwater iodine content at provincial level in  
139 China

140 **Supplementary Table 13** | Average proportions of groundwater used for water supply  
141 over 5 years (2010 ~ 2014 and 2015 ~ 2019) at provincial level in China

142 **Supplementary Table 14** | Iodine content in drinking water of China

143 **Supplementary Table 15** | Proportion of groundwater iodine species at provincial  
144 level in China

145 **Supplementary Table 16** | Key parameters for iodine-induced non-carcinogenic risk  
146 assessment

147 **Supplementary Table 17** | Salt iodization levels in different provinces of China

148 **Supplementary Table 18** | Dietary reference values for iodine

149 **Supplementary Table 19** | Recommended limits for identifying high iodine  
150 groundwater

151      **Supplementary Table 1 | Information on groundwater sampling sites.**

| Geo-environmental zone                               | Terrain partition | Well type         | Groundwater type | Number of samples |
|------------------------------------------------------|-------------------|-------------------|------------------|-------------------|
| Northeast plain-mountain (Zone I)                    | III               | Newly constructed | Phreatic         | 88                |
|                                                      |                   |                   | Confined         | 13                |
|                                                      |                   | Reconstructed     | Phreatic         | 10                |
|                                                      |                   |                   | Confined         | 3                 |
| Huanghuaihai-Yangtze river delta plain (Zone II)     | III               | Newly constructed | Phreatic         | 156               |
|                                                      |                   |                   | Confined         | 72                |
|                                                      |                   | Reconstructed     | Phreatic         | 22                |
|                                                      |                   |                   | Confined         | 35                |
| South China bedrock low mountain foothill (Zone III) | III               | Newly constructed | Phreatic         | 26                |
|                                                      |                   |                   | Confined         | 25                |
|                                                      |                   | Reconstructed     | Phreatic         | 0                 |
|                                                      |                   |                   | Confined         | 0                 |

152



153      **Supplementary Table 1 | Information on groundwater sampling sites (*continued*).**

| Geo-environmental zone                                    | Terrain partition | Well type         | Groundwater type | Number of samples |
|-----------------------------------------------------------|-------------------|-------------------|------------------|-------------------|
| Northwest loess plateau (Zone IV)                         | II                | Newly constructed | Phreatic         | 59                |
|                                                           |                   |                   | Confined         | 29                |
|                                                           |                   | Reconstructed     | Phreatic         | 10                |
|                                                           |                   |                   | Confined         | 18                |
| Southwest China Karst rock mountain (Zone V)              | II                | Newly constructed | Phreatic         | 24                |
|                                                           |                   |                   | Confined         | 11                |
|                                                           |                   | Reconstructed     | Phreatic         | 2                 |
|                                                           |                   |                   | Confined         | 0                 |
| Northwest arid desert (Zone VI)                           | II                | Newly constructed | Phreatic         | 17                |
|                                                           |                   |                   | Confined         | 11                |
|                                                           |                   | Reconstructed     | Phreatic         | 5                 |
|                                                           |                   |                   | Confined         | 3                 |
| Qinghai-Tibet plateau Alpine frozen soil areas (Zone VII) | I                 | Newly constructed | Phreatic         | 40                |
|                                                           |                   |                   | Confined         | 4                 |
|                                                           |                   | Reconstructed     | Phreatic         | 3                 |
|                                                           |                   |                   | Confined         | 0                 |

155 **Supplementary Table 2 | Contents of groundwater iodine and its species in different geo-**  
156 **environmental zones of China.**

| Geo-environmental zone |               | Content (μg/L) | Median (μg/L) | Mean (μg/L) |
|------------------------|---------------|----------------|---------------|-------------|
| Zone I                 | Total iodine  | 0.28~590.40    | 1.51          | 9.85        |
|                        | Iodide        | 0.01~517.14    | 0.69          | 7.38        |
|                        | Iodate        | <DL~37.64      | 0.40          | 1.21        |
|                        | Organo-iodine | 0.00~39.37     | 0.23          | 1.25        |
| Zone II                | Total iodine  | 0.82~982.30    | 31.50         | 86.09       |
|                        | Iodide        | 0.01~728.52    | 21.30         | 71.10       |
|                        | Iodate        | <DL~209.59     | 2.29          | 6.42        |
|                        | Organo-iodine | 0.00~242.27    | 2.38          | 8.56        |
| Zone III               | Total iodine  | 1.63~384.10    | 14.08         | 45.33       |
|                        | Iodide        | 0.01~352.19    | 5.88          | 31.67       |
|                        | Iodate        | 0.46~27.91     | 3.31          | 6.60        |
|                        | Organo-iodine | 0.12~28.90     | 4.31          | 7.06        |
| Zone IV                | Total iodine  | 0.39~483.60    | 7.02          | 22.37       |
|                        | Iodide        | 0.01~429.98    | 1.08          | 14.93       |
|                        | Iodate        | <DL~44.82      | 2.41          | 4.92        |
|                        | Organo-iodine | 0.00~29.43     | 0.90          | 2.53        |
| Zone V                 | Total iodine  | 0.51~90.20     | 4.00          | 7.03        |
|                        | Iodide        | 0.02~79.21     | 1.08          | 4.00        |
|                        | Iodate        | <DL~10.28      | 0.88          | 1.48        |
|                        | Organo-iodine | 0.02~9.87      | 0.88          | 1.55        |

157 DL = detection limit.

158 **Supplementary Table 2 | Contents of groundwater iodine and its species in different geo-**  
159 **environmental zones of China (*continued*).**

| Geo-environmental zone |               | Content (µg/L) | Median (µg/L) | Mean (µg/L) |
|------------------------|---------------|----------------|---------------|-------------|
| Zone VI                | Total iodine  | 0.94~1006.25   | 3.96          | 43.26       |
|                        | Iodide        | 0.01~956.73    | 0.91          | 35.43       |
|                        | Iodate        | 0.48~69.73     | 2.12          | 5.87        |
|                        | Organo-iodine | 0.01~16.37     | 0.59          | 1.96        |
| Zone VII               | Total iodine  | 0.69~39.56     | 3.38          | 4.67        |
|                        | Iodide        | 0.18~23.93     | 0.98          | 2.00        |
|                        | Iodate        | <DL~4.96       | 1.02          | 1.32        |
|                        | Organo-iodine | 0.10~10.96     | 1.02          | 1.34        |

160 DL = detection limit.

161 **Supplementary Table 3 | Hydrochemistry composition of groundwater in Zones I and II.**

| Index                         | Units | Minimum |         | Maximum |          | Median |         | Standard deviation |         | DL   |
|-------------------------------|-------|---------|---------|---------|----------|--------|---------|--------------------|---------|------|
|                               |       | Zone I  | Zone II | Zone I  | Zone II  | Zone I | Zone II | Zone I             | Zone II |      |
| K <sup>+</sup>                | mg/L  | <DL     | <DL     | 95.00   | 132.00   | 1.3    | 1.30    | 9.03               | 12.03   | 0.03 |
| Na <sup>+</sup>               | mg/L  | <DL     | 3.99    | 970.00  | 7421.00  | 30.26  | 105.54  | 121.55             | 623.53  | 0.10 |
| Ca <sup>2+</sup>              | mg/L  | 1.61    | 1.82    | 245.03  | 748.59   | 45.49  | 69.90   | 40.98              | 77.85   | 1.00 |
| Mg <sup>2+</sup>              | mg/L  | 2.51    | <DL     | 145.54  | 956.00   | 18.06  | 29.45   | 21.95              | 101.78  | 1.00 |
| CO <sub>3</sub> <sup>2-</sup> | mg/L  | <DL     | <DL     | 1.75    | 145.00   | <DL    | <DL     | 0.17               | 12.91   | -    |
| HCO <sub>3</sub> <sup>-</sup> | mg/L  | <DL     | <DL     | 25.11   | 1677.00  | 3.18   | 387.00  | 4.05               | 217.22  | 5.00 |
| Cl <sup>-</sup>               | mg/L  | <DL     | <DL     | 1017.10 | 10115.46 | 14.08  | 61.01   | 119.82             | 790.00  | 0.04 |
| SO <sub>4</sub> <sup>2-</sup> | mg/L  | <DL     | <DL     | 1002.80 | 1970.27  | 14.98  | 72.29   | 111.28             | 307.79  | 0.10 |

162 DL = detection limit.

163

**Supplementary Table 4 | Temporal variation of groundwater storage accumulation <sup>a</sup> in Zones I and II (1971 ~ 2016).**

| Year | Groundwater storage accumulation (mm) |         | Year | Groundwater storage accumulation (mm) |         |
|------|---------------------------------------|---------|------|---------------------------------------|---------|
|      | Zone I                                | Zone II |      | Zone I                                | Zone II |
| 1971 | 0.0                                   | 0.0     | 1983 | -50.6                                 | -1359.3 |
| 1972 | -33.4                                 | -226.2  | 1984 | -21.3                                 | -1403.1 |
| 1973 | 23.0                                  | -93.3   | 1985 | 0.3                                   | -1354.7 |
| 1974 | -47.1                                 | -165.9  | 1986 | -31.6                                 | -1877.2 |
| 1975 | -50.0                                 | -236.3  | 1987 | -62.4                                 | -1914.5 |
| 1976 | -145.6                                | -460.1  | 1988 | 12.4                                  | -2211.8 |
| 1977 | -106.6                                | -416.2  | 1989 | -188.0                                | -2297.7 |
| 1978 | -135.1                                | -684.9  | 1990 | -129.8                                | -2119.3 |
| 1979 | -181.7                                | -590.2  | 1991 | -49.2                                 | -2198.4 |
| 1980 | -147.8                                | -786.1  | 1992 | -184.2                                | -2773.3 |
| 1981 | -51.6                                 | -1283.8 | 1993 | -151.0                                | -2980.2 |
| 1982 | -150.5                                | -1195.2 | 1994 | -82.7                                 | -3241.0 |

<sup>a</sup> Groundwater storage accumulation: the accumulated depth (mm) of groundwater per unit area.

166 **Supplementary Table 4 | Temporal variation of groundwater storage accumulation <sup>a</sup> in Zones I and II (1971 ~ 2016) (*continued*).**

| Year | Groundwater storage accumulation (mm) |         | Year | Groundwater storage accumulation (mm) |          |
|------|---------------------------------------|---------|------|---------------------------------------|----------|
|      | Zone I                                | Zone II |      | Zone I                                | Zone II  |
| 1995 | -220.2                                | -3261.5 | 2006 | -780.2                                | -6295.8  |
| 1996 | -296.6                                | -3311.0 | 2007 | -972.4                                | -6738.4  |
| 1997 | -316.7                                | -3628.0 | 2008 | -1069.4                               | -7161.7  |
| 1998 | -134.0                                | -3525.6 | 2009 | -1004.9                               | -7619.4  |
| 1999 | -239.6                                | -4287.6 | 2010 | -1093.0                               | -8065.6  |
| 2000 | -419.3                                | -4411.9 | 2011 | -1169.4                               | -8841.6  |
| 2001 | -587.8                                | -4823.3 | 2012 | -1126.8                               | -9201.7  |
| 2002 | -673.7                                | -5415.2 | 2013 | -800.9                                | -9777.4  |
| 2003 | -617.6                                | -5264.1 | 2014 | -1062.5                               | -10591.2 |
| 2004 | -639.6                                | -5513.9 | 2015 | -1291.9                               | -11012.2 |
| 2005 | -668.8                                | -5810.7 | 2016 | -1358.0                               | -11389.4 |

167 <sup>a</sup> Groundwater storage accumulation: the accumulated depth (mm) of groundwater per unit area.

168 **Supplementary Table 5 | Annual water supply volume ( $\times 10^8$  m<sup>3</sup>) of main provinces**

169 **involved in Zone I.**

| Year | Heilongjiang |             | Liaoning |             | Jilin  |             |
|------|--------------|-------------|----------|-------------|--------|-------------|
|      | Total        | Groundwater | Total    | Groundwater | Total  | Groundwater |
| 2004 | 259.44       | 103.95      | 99.19    | 38.96       | 130.23 | 65.00       |
| 2005 | 271.51       | 113.08      | 98.39    | 36.84       | 133.26 | 64.27       |
| 2006 | 286.21       | 114.37      | 102.90   | 38.03       | 141.24 | 67.01       |
| 2007 | 291.37       | 124.63      | 100.78   | 38.75       | 142.87 | 67.17       |
| 2008 | 297.01       | 127.38      | 104.08   | 40.61       | 142.78 | 66.58       |
| 2009 | 316.25       | 136.04      | 111.09   | 42.51       | 142.79 | 67.35       |
| 2010 | 325.00       | 146.14      | 120.04   | 44.17       | 143.67 | 67.58       |
| 2011 | 352.40       | 149.90      | 131.20   | 43.70       | 144.50 | 64.30       |
| 2012 | 358.90       | 161.50      | 129.80   | 43.30       | 142.20 | 61.30       |
| 2013 | 362.30       | 167.40      | 131.50   | 44.00       | 142.10 | 60.00       |
| 2014 | 364.10       | 167.60      | 133.00   | 44.90       | 141.80 | 58.40       |
| 2015 | 355.30       | 157.70      | 133.60   | 44.00       | 140.80 | 58.60       |
| 2016 | 352.60       | 166.80      | 132.50   | 44.90       | 135.40 | 57.00       |
| 2017 | 353.10       | 163.10      | 126.70   | 44.70       | 131.10 | 54.50       |

170 Data source: China's Statistical Yearbook on Environment (National Bureau of Statistics).

171

172 **Supplementary Table 6 | Annual water supply volume ( $\times 10^8$  m<sup>3</sup>) of main provinces**

173 **involved in Zone II.**

| Year | Beijing |             | Tianjin |             | Hebei  |             |
|------|---------|-------------|---------|-------------|--------|-------------|
|      | Total   | Groundwater | Total   | Groundwater | Total  | Groundwater |
| 2004 | 34.55   | 26.80       | 22.06   | 7.07        | 195.87 | 157.75      |
| 2005 | 34.50   | 24.90       | 23.09   | 6.98        | 201.78 | 162.78      |
| 2006 | 34.30   | 24.34       | 22.96   | 6.76        | 204.00 | 164.64      |
| 2007 | 34.81   | 24.19       | 23.37   | 6.81        | 202.50 | 163.08      |
| 2008 | 35.08   | 22.94       | 22.33   | 6.25        | 195.02 | 156.17      |
| 2009 | 35.50   | 21.80       | 23.37   | 6.01        | 193.72 | 154.64      |
| 2010 | 35.20   | 21.19       | 22.49   | 5.87        | 193.68 | 155.98      |
| 2011 | 36.00   | 20.90       | 23.10   | 5.80        | 196.00 | 154.90      |
| 2012 | 35.90   | 20.40       | 23.10   | 5.50        | 195.30 | 151.30      |
| 2013 | 36.40   | 20.00       | 23.80   | 5.70        | 191.30 | 144.60      |
| 2014 | 37.50   | 19.60       | 24.10   | 5.30        | 192.80 | 142.10      |
| 2015 | 38.20   | 18.20       | 25.70   | 4.90        | 187.20 | 133.60      |
| 2016 | 38.80   | 17.50       | 27.2    | 4.7         | 182.6  | 125.0       |
| 2017 | 39.50   | 16.60       | 27.5    | 4.6         | 181.6  | 116.0       |

174 Data source: China's Statistical Yearbook on Environment (National Bureau of Statistics).

175



176 **Supplementary Table 7 | Annual groundwater resource volumes ( $\times 10^8$  m<sup>3</sup>) of main**  
177 **provinces involved in Zone I and Zone II.**

| Year | Zone I       |          |        | Zone II |         |        |
|------|--------------|----------|--------|---------|---------|--------|
|      | Heilongjiang | Liaoning | Jilin  | Beijing | Tianjin | Hebei  |
| 2004 | 273.70       | 94.40    | 109.60 | 16.50   | 5.20    | 131.10 |
| 2005 | 288.80       | 122.50   | 130.20 | 18.50   | 4.50    | 109.70 |
| 2006 | 279.20       | 104.60   | 91.60  | 18.20   | 4.40    | 94.30  |
| 2007 | 232.80       | 86.30    | 93.40  | 18.80   | 4.80    | 107.20 |
| 2008 | 247.80       | 99.60    | 105.40 | 24.90   | 5.90    | 136.30 |
| 2009 | 313.40       | 97.30    | 87.60  | 17.80   | 5.60    | 122.70 |
| 2010 | 277.90       | 141.90   | 146.80 | 18.90   | 4.50    | 112.90 |
| 2011 | 237.20       | 112.90   | 111.90 | 21.20   | 5.20    | 126.20 |
| 2012 | 289.80       | 147.00   | 147.40 | 26.50   | 7.60    | 164.80 |
| 2013 | 381.50       | 160.20   | 139.40 | 18.70   | 5.00    | 138.80 |
| 2014 | 295.40       | 120.20   | 82.30  | 16.00   | 3.70    | 89.30  |
| 2015 | 283.00       | 127.40   | 83.20  | 20.60   | 4.90    | 113.60 |
| 2016 | 285.90       | 154.70   | 120.90 | 24.20   | 6.10    | 133.70 |
| 2017 | 273.20       | 133.30   | 86.60  | 20.40   | 5.50    | 116.30 |

178 Data source: China Statistical Yearbook on Environment (National Bureau of Statistics).

179 **Supplementary Table 8 | Proportions of iodine species in different groundwater types.**

| Well type            | Groundwater type | Proportion of $\text{IO}_3^-$ and<br>organo-iodine |        | Proportion of $\text{I}^-$ |        |
|----------------------|------------------|----------------------------------------------------|--------|----------------------------|--------|
|                      |                  | Median                                             | Mean   | Median                     | Mean   |
| Newly<br>constructed | Phreatic         | 52.61%                                             | 50.77% | 47.39%                     | 49.23% |
|                      | Confined         | 44.24%                                             | 47.11% | 55.76%                     | 52.89% |
| Reconstructed        | Phreatic         | 70.08%                                             | 59.39% | 29.92%                     | 40.61% |
|                      | Confined         | 65.51%                                             | 56.80% | 34.49%                     | 43.20% |

180

181    **Supplementary Table 9 | Mean and 95th percentile values of hazard quotient (HQ) via drinking water consumption.**

| Geo-environmental zones | Iodine deficiency |                 |                    | Iodine excess |                 |                    |
|-------------------------|-------------------|-----------------|--------------------|---------------|-----------------|--------------------|
|                         | Mean              | 95th percentile | Proportion of risk | Mean          | 95th percentile | Proportion of risk |
| Zone I                  | 1.23              | 1.84            | 84.96%             | 0.66          | 0.98            | 4.42%              |
| Zone II                 | 10.76             | 47.50           | 28.10%             | 5.74          | 25.33           | 62.41%             |
| Zone III                | 5.67              | 23.31           | 31.37%             | 3.02          | 12.43           | 47.06%             |
| Zone IV                 | 2.80              | 7.58            | 53.91%             | 1.49          | 4.04            | 21.74%             |
| Zone V                  | 0.88              | 2.03            | 86.49%             | 0.47          | 1.08            | 5.41%              |
| Zone VI                 | 5.41              | 13.31           | 72.22%             | 2.88          | 7.10            | 19.44%             |
| Zone VII                | 0.58              | 1.11            | 89.36%             | 0.31          | 0.59            | 2.13%              |

182

183

184 **Supplementary Table 10 | Iodine state and thyroid nodules prevalence in 36 cities from 31 provinces of China.**

| Province     | Sampled city              | Median groundwater iodine content (µg/L) | Median groundwater iodate content (µg/L) | Median groundwater iodide content (µg/L) | Median urine iodine content (µg/L) | Prevalence of thyroid nodules | Prevalence of Subclinical hypothyroidism |
|--------------|---------------------------|------------------------------------------|------------------------------------------|------------------------------------------|------------------------------------|-------------------------------|------------------------------------------|
| Anhui        | Hefei                     | 29.52                                    | 3.93                                     | 22.96                                    | 208.64                             | 9.69%                         | 2.49%                                    |
| Beijing      | Beijing                   | 10.97                                    | 3.05                                     | 4.71                                     | 151.52                             | 22.08%                        | 2.85%                                    |
| Chongqing    | Chongqing                 | 9.77                                     | 0.83                                     | 4.00                                     | 193.48                             | 22.37%                        | 2.37%                                    |
| Fujian       | Fuzhou                    | 73.66                                    | 9.76                                     | 12.52                                    | 136.60                             | 30.75%                        | 1.29%                                    |
| Gansu        | Longnan                   | 12.09                                    | 2.36                                     | 9.21                                     | 226.53                             | 17.58%                        | 6.33%                                    |
| Guangdong    | Guangzhou                 | 11.16                                    | 3.35                                     | 4.99                                     | 128.80                             | 41.66%                        | 1.42%                                    |
| Guangxi      | Chongzuo                  | 1.91                                     | 0.71                                     | 1.01                                     | 153.41                             | 13.53%                        | 1.92%                                    |
| Guizhou      | Guiyang                   | 0.85                                     | 0.32                                     | 0.51                                     | 200.30                             | 7.43%                         | 5.50%                                    |
| Hainan       | Haikou and Zhanzhou       | 13.39                                    | 1.45                                     | 9.68                                     | 151.96                             | 10.80%                        | 1.38%                                    |
| Hebei        | Shijiazhuang and Cangzhou | 59.30                                    | 7.48                                     | 42.07                                    | 200.90                             | 17.40%                        | 2.57%                                    |
| Heilongjiang | Harbin                    | 0.98                                     | 0.25                                     | 0.37                                     | 155.10                             | 22.79%                        | 1.67%                                    |

185 **Supplementary Table 10 | Iodine state and thyroid nodules prevalence in 36 cities from 31 provinces of China (*continued*).**

| Province       | Sampled city            | Median groundwater iodine content (µg/L) | Median groundwater iodate content (µg/L) | Median groundwater iodide content (µg/L) | Median urine iodine content (µg/L) | Prevalence of thyroid nodules | Prevalence of Subclinical hypothyroidism |
|----------------|-------------------------|------------------------------------------|------------------------------------------|------------------------------------------|------------------------------------|-------------------------------|------------------------------------------|
| Henan          | Xinxiang and Kaifeng    | 245.6                                    | 34.16                                    | 192.16                                   | 225.41                             | 13.61%                        | 4.57%                                    |
| Hubei          | Shiyan                  | 97.16                                    | 18.04                                    | 60.01                                    | 191.84                             | 9.87%                         | 4.00%                                    |
| Hunan          | Changde                 | 30.57                                    | 2.75                                     | 19.44                                    | 172.40                             | 14.63%                        | 3.87%                                    |
| Inner Mongolia | Hohhot                  | 9.22                                     | 3.98                                     | 3.81                                     | 207.00                             | 24.41%                        | 3.99%                                    |
| Jiangsu        | Xuzhou                  | 246.65                                   | 67.94                                    | 161.01                                   | 304.80                             | 19.06%                        | 3.17%                                    |
| Jiangxi        | Nanchang and Jingdezhen | 27.45                                    | 8.68                                     | 9.37                                     | 176.60                             | 9.97%                         | 2.05%                                    |
| Jilin          | Changchun               | 2.34                                     | 0.76                                     | 1.15                                     | 178.15                             | 20.84%                        | 1.68%                                    |
| Liaoning       | Dalian                  | 0.97                                     | 0.33                                     | 0.54                                     | 149.80                             | 23.73%                        | 2.03%                                    |
| Ningxia        | Guyuan                  | 175.19                                   | 58.81                                    | 86.10                                    | 250.32                             | 30.17%                        | 5.10%                                    |
| Qinghai        | Xining and Haidong      | 3.92                                     | 1.13                                     | 1.35                                     | 218.42                             | 7.69%                         | 10.43%                                   |
| Shaanxi        | Xi'an                   | 25.85                                    | 15.41                                    | 7.81                                     | 220.59                             | 11.33%                        | 4.31%                                    |

186 **Supplementary Table 10 | Iodine state and thyroid nodules prevalence in 36 cities from 31 provinces of China (*continued*).**

| Province | Sampled city | Median groundwater iodine content (µg/L) | Median groundwater iodate content (µg/L) | Median groundwater iodide content (µg/L) | Median urine iodine content (µg/L) | Prevalence of thyroid nodules | Prevalence of Subclinical hypothyroidism |
|----------|--------------|------------------------------------------|------------------------------------------|------------------------------------------|------------------------------------|-------------------------------|------------------------------------------|
| Shandong | Taian        | 5.47                                     | 2.95                                     | 0.99                                     | 137.90                             | 10.79%                        | 2.23%                                    |
| Shanghai | Shanghai     | 184.55                                   | 49.55                                    | 83.77                                    | 164.15                             | 24.78%                        | 2.29%                                    |
| Shanxi   | Taiyuan      | 4.83                                     | 2.64                                     | 0.82                                     | 211.85                             | 11.70%                        | 2.34%                                    |
| Sichuan  | Chengdu      | 2.86                                     | 0.87                                     | 1.36                                     | 172.10                             | 10.87%                        | 3.59%                                    |
| Tianjin  | Tianjin      | 40.60                                    | 10.69                                    | 18.67                                    | 142.20                             | 30.12%                        | 6.69%                                    |
| Tibet    | Lhasa        | 1.739                                    | 0.36                                     | 0.58                                     | 171.40                             | 25.48%                        | 1.71%                                    |
| Xinjiang | Turpan       | 3.302                                    | 2.06                                     | 1.07                                     | 147.98                             | 33.10%                        | 3.29%                                    |
| Yunnan   | Kunming      | 2.098                                    | 0.54                                     | 1.08                                     | 177.70                             | 21.47%                        | 4.54%                                    |
| Zhejiang | Hangzhou     | 13.4                                     | 4.35                                     | 1.84                                     | 216.93                             | 15.29%                        | 3.02%                                    |

187

188    **Supplementary Table 11 | Proportion of monitored wells at iodine-induced risk at provincial level in China.**

| Province       | Monitored wells with iodine-induced risks |        | Province  | Monitored wells with iodine-induced risks |        |
|----------------|-------------------------------------------|--------|-----------|-------------------------------------------|--------|
|                | Deficiency                                | Excess |           | Deficiency                                | Excess |
| Hebei          | 35.80%                                    | 48.15% | Ningxia   | 20.00%                                    | 60.00% |
| Henan          | 34.69%                                    | 61.22% | Hainan    | 25.00%                                    | 25.00% |
| Inner Mongolia | 14.29%                                    | 42.86% | Hunan     | 0.00%                                     | 80.00% |
| Heilongjiang   | 88.89%                                    | 0.00%  | Sichuan   | 100.00%                                   | 0.00%  |
| Beijing        | 44.44%                                    | 38.89% | Guangxi   | 40.00%                                    | 30.00% |
| Shanxi         | 55.56%                                    | 22.22% | Jiangxi   | 40.00%                                    | 40.00% |
| Liaoning       | 97.50%                                    | 0.00%  | Guangdong | 12.50%                                    | 50.00% |
| Shandong       | 45.07%                                    | 45.07% | Hubei     | 25.00%                                    | 75.00% |
| Shaanxi        | 65.38%                                    | 23.08% | Fujian    | 12.50%                                    | 62.50% |
| Jilin          | 86.05%                                    | 4.65%  | Guizhou   | 83.33%                                    | 16.67% |
| Gansu          | 70.59%                                    | 5.88%  | Yunnan    | 100.00%                                   | 0.00%  |

190    **Supplementary Table 11 | Proportion of monitored wells at iodine-induced risk at provincial level in China (*continued*).**

| Province | Monitored wells with iodine-induced risks |        | Province  | Monitored wells with iodine-induced risks |         |
|----------|-------------------------------------------|--------|-----------|-------------------------------------------|---------|
|          | Deficiency                                | Excess |           | Deficiency                                | Excess  |
| Xinjiang | 69.57%                                    | 21.74  | Chongqing | 40.00%                                    | 20.00%  |
| Qinghai  | 85.00%                                    | 0.00%  | Jiangsu   | 0.00%                                     | 92.86%  |
| Tianjin  | 20.00%                                    | 66.67% | Zhejiang  | 40.00%                                    | 40.00%  |
| Anhui    | 14.29%                                    | 71.43% | Shanghai  | 0.00%                                     | 100.00% |
| Tibet    | 95.83%                                    | 4.17%  |           |                                           |         |

191



192 **Supplementary Table 12 | Median groundwater iodine content at provincial level in**  
193 **China.**

| Province       | Median content<br>(µg/L) | Province  | Median content<br>(µg/L) |
|----------------|--------------------------|-----------|--------------------------|
| Hebei          | 13.16                    | Ningxia   | 20.59                    |
| Henan          | 33.42                    | Hainan    | 13.52                    |
| Inner Mongolia | 14.74                    | Hunan     | 30.57                    |
| Heilongjiang   | 1.89                     | Sichuan   | 2.86                     |
| Beijing        | 10.97                    | Guangxi   | 13.98                    |
| Shanxi         | 7.18                     | Jiangxi   | 12.94                    |
| Liaoning       | 0.86                     | Guangdong | 32.29                    |
| Shandong       | 10.34                    | Hubei     | 97.16                    |
| Shaanxi        | 4.93                     | Fujian    | 21.40                    |
| Jilin          | 2.34                     | Guizhou   | 2.18                     |
| Gansu          | 3.41                     | Yunnan    | 3.20                     |
| Xinjiang       | 4.58                     | Chongqing | 9.77                     |
| Qinghai        | 4.59                     | Jiangsu   | 78.75                    |
| Tianjin        | 40.60                    | Zhejiang  | 13.40                    |
| Anhui          | 26.84                    | Shanghai  | 184.55                   |
| Tibet          | 2.81                     |           |                          |

194

**Supplementary Table 13 | Average proportions of groundwater used for water supply over 5 years (2010 ~ 2014 and 2015 ~ 2019) at provincial level in China.**

| Province       | Proportion of groundwater |            | Province  | Proportion of groundwater |            |
|----------------|---------------------------|------------|-----------|---------------------------|------------|
|                | 2010 ~2014                | 2015 ~2019 |           | 2010 ~2014                | 2015 ~2019 |
| Hebei          | 77.27%                    | 62.97%     | Ningxia   | 7.72%                     | 8.54%      |
| Henan          | 57.94%                    | 50.59%     | Hainan    | 7.20%                     | 6.46%      |
| Inner Mongolia | 49.53%                    | 45.98%     | Hunan     | 5.63%                     | 4.48%      |
| Heilongjiang   | 44.95%                    | 45.19%     | Sichuan   | 7.34%                     | 4.37%      |
| Beijing        | 56.46%                    | 42.56%     | Guangxi   | 3.69%                     | 3.66%      |
| Shanxi         | 51.41%                    | 41.47%     | Jiangxi   | 3.80%                     | 3.28%      |
| Liaoning       | 43.61%                    | 41.33%     | Guangdong | 3.91%                     | 3.16%      |
| Shandong       | 40.23%                    | 37.46%     | Hubei     | 3.21%                     | 2.73%      |
| Shaanxi        | 37.96%                    | 35.15%     | Fujian    | 2.87%                     | 2.71%      |
| Jilin          | 34.14%                    | 34.30%     | Guizhou   | 2.89%                     | 2.57%      |
| Gansu          | 21.71%                    | 21.92%     | Yunnan    | 3.43%                     | 2.43%      |
| Xinjiang       | 19.47%                    | 19.62%     | Chongqing | 1.96%                     | 1.55%      |
| Qinghai        | 14.67%                    | 18.49%     | Jiangsu   | 1.68%                     | 1.38%      |
| Tianjin        | 24.19%                    | 16.44%     | Zhejiang  | 1.66%                     | 0.68%      |
| Anhui          | 10.92%                    | 10.76%     | Shanghai  | 0.10%                     | 0.00%      |
| Tibet          | 10.53%                    | 10.57%     |           |                           |            |

Data source: China's Statistical Yearbook on Environment (National Bureau of Statistics).

199 **Supplementary Table 14 | Iodine content in drinking water of China.**

| Province       | Number of sampled counties | Median content (µg/L) | Number of counties |             |              |           |
|----------------|----------------------------|-----------------------|--------------------|-------------|--------------|-----------|
|                |                            |                       | <10 µg/L           | 10~100 µg/L | 100~300 µg/L | >300 µg/L |
| Beijing        | 16                         | 3.4                   | 16                 | 0           | 0            | 0         |
| Tianjin        | 16                         | 5.1                   | 12                 | 3           | 1            | 0         |
| Hebei          | 172                        | 4.7                   | 120                | 31          | 17           | 4         |
| Shanxi         | 119                        | 5.0                   | 88                 | 30          | 1            | 0         |
| Inner Mongolia | 104                        | 6.7                   | 73                 | 31          | 0            | 0         |
| Liaoning       | 105                        | 3.7                   | 95                 | 10          | 0            | 0         |
| Jilin          | 64                         | 4.6                   | 57                 | 7           | 0            | 0         |
| Heilongjiang   | 132                        | 5.0                   | 120                | 12          | 0            | 0         |
| Shanghai       | 16                         | 2.7                   | 15                 | 1           | 0            | 0         |
| Jiangsu        | 103                        | 7.3                   | 79                 | 22          | 1            | 1         |
| Zhejiang       | 89                         | 2.1                   | 83                 | 6           | 0            | 0         |
| Anhui          | 105                        | 4.3                   | 77                 | 18          | 10           | 0         |
| Fujian         | 88                         | 2.2                   | 83                 | 5           | 0            | 0         |
| Jiangxi        | 100                        | 2.5                   | 100                | 0           | 0            | 0         |
| Shandong       | 137                        | 9.2                   | 74                 | 49          | 11           | 3         |
| Henan          | 170                        | 9.6                   | 94                 | 65          | 11           | 0         |

200 Data source: Investigation on iodine content in drinking water of China (National Health Commission of  
 201 the People's Republic of China).

202

203     **Supplementary Table 14 | Iodine content in drinking water of China (*continued*).**

| Province  | Number of<br>sampled<br>counties | Median<br>content<br>( $\mu\text{g/L}$ ) | Number of counties  |                        |                         |                      |
|-----------|----------------------------------|------------------------------------------|---------------------|------------------------|-------------------------|----------------------|
|           |                                  |                                          | <10 $\mu\text{g/L}$ | 10~100 $\mu\text{g/L}$ | 100~300 $\mu\text{g/L}$ | >300 $\mu\text{g/L}$ |
| Hubei     | 103                              | 3.7                                      | 101                 | 2                      | 0                       | 0                    |
| Hunan     | 132                              | 2.5                                      | 121                 | 10                     | 1                       | 0                    |
| Guangdong | 128                              | 5.1                                      | 107                 | 21                     | 0                       | 0                    |
| Guangxi   | 112                              | 3.3                                      | 107                 | 5                      | 0                       | 0                    |
| Hainan    | 25                               | 6.0                                      | 25                  | 0                      | 0                       | 0                    |
| Chongqing | 39                               | 1.5                                      | 39                  | 0                      | 0                       | 0                    |
| Sichuan   | 189                              | 2.1                                      | 188                 | 1                      | 0                       | 0                    |
| Guizhou   | 91                               | 1.8                                      | 91                  | 0                      | 0                       | 0                    |
| Yunnan    | 129                              | 1.3                                      | 129                 | 0                      | 0                       | 0                    |
| Tibet     | 74                               | 2.2                                      | 74                  | 0                      | 0                       | 0                    |
| Shaanxi   | 110                              | 4.6                                      | 77                  | 32                     | 0                       | 0                    |
| Gansu     | 89                               | 2.2                                      | 89                  | 0                      | 0                       | 0                    |
| Qinghai   | 43                               | 1.7                                      | 42                  | 1                      | 0                       | 0                    |
| Ningxia   | 23                               | 6.4                                      | 18                  | 5                      | 0                       | 0                    |
| Xinjiang  | 113                              | 3.8                                      | 104                 | 9                      | 0                       | 0                    |

204     Data source: Investigation on iodine content in drinking water of China (National Health Commission of  
205     the People's Republic of China).

206 **Supplementary Table 15 | Proportion of groundwater iodine species at provincial level in China.**

| Province       | Proportion of iodine species |                              |               | Province  | Proportion of iodine species |                              |               |
|----------------|------------------------------|------------------------------|---------------|-----------|------------------------------|------------------------------|---------------|
|                | I <sup>-</sup>               | IO <sub>3</sub> <sup>-</sup> | organo-iodine |           | I <sup>-</sup>               | IO <sub>3</sub> <sup>-</sup> | organo-iodine |
| Hebei          | 60.52%                       | 13.99%                       | 25.50%        | Ningxia   | 37.05%                       | 38.31%                       | 24.64%        |
| Henan          | 65.28%                       | 17.67%                       | 17.05%        | Hainan    | 57.88%                       | 16.67%                       | 25.45%        |
| Inner Mongolia | 56.21%                       | 23.29%                       | 20.50%        | Hunan     | 53.26%                       | 19.54%                       | 27.21%        |
| Heilongjiang   | 44.98%                       | 28.59%                       | 26.43%        | Sichuan   | 47.54%                       | 30.50%                       | 21.96%        |
| Beijing        | 42.97%                       | 27.84%                       | 29.19%        | Guangxi   | 50.75%                       | 25.85%                       | 23.41%        |
| Shanxi         | 22.76%                       | 57.96%                       | 19.28%        | Jiangxi   | 24.50%                       | 36.44%                       | 39.06%        |
| Liaoning       | 60.69%                       | 29.10%                       | 10.21%        | Guangdong | 55.37%                       | 24.49%                       | 20.15%        |
| Shandong       | 45.39%                       | 26.85%                       | 27.75%        | Hubei     | 61.76%                       | 18.56%                       | 19.68%        |
| Shaanxi        | 37.55%                       | 47.98%                       | 14.47%        | Fujian    | 33.34%                       | 40.31%                       | 26.35%        |
| Jilin          | 49.18%                       | 32.44%                       | 18.37%        | Guizhou   | 47.01%                       | 29.49%                       | 23.50%        |
| Gansu          | 36.34%                       | 42.01%                       | 21.66%        | Yunnan    | 33.66%                       | 26.60%                       | 39.74%        |

207

208 **Supplementary Table 15 | Proportion of groundwater iodine species at provincial level in China (*continued*).**

| Province | Proportion of iodine species |                              |               | Province  | Proportion of iodine species |                              |               |
|----------|------------------------------|------------------------------|---------------|-----------|------------------------------|------------------------------|---------------|
|          | I <sup>-</sup>               | IO <sub>3</sub> <sup>-</sup> | organo-iodine |           | I <sup>-</sup>               | IO <sub>3</sub> <sup>-</sup> | organo-iodine |
| Xinjiang | 36.55%                       | 48.28%                       | 15.17%        | Chongqing | 53.64%                       | 14.27%                       | 32.09%        |
| Qinghai  | 37.02%                       | 33.84%                       | 29.15%        | Jiangsu   | 70.65%                       | 16.46%                       | 12.89%        |
| Tianjin  | 45.98%                       | 26.33%                       | 27.70%        | Zhejiang  | 13.70%                       | 32.49%                       | 53.81%        |
| Anhui    | 71.20%                       | 18.59%                       | 10.22%        | Shanghai  | 80.95%                       | 10.30%                       | 8.74%         |
| Tibet    | 35.46%                       | 27.74%                       | 36.80%        |           |                              |                              |               |

209

210

**Supplementary Table 16 | Key parameters for iodine-induced non-carcinogenic risk assessment.**

| Parameter                                 | Units    | Value         | Parameter                                   | Units       | Value                                |
|-------------------------------------------|----------|---------------|---------------------------------------------|-------------|--------------------------------------|
| Concentration of iodine (C <sub>w</sub> ) | µg/L     | Present study | Body weight (BW)                            | kg          | 60                                   |
| Ingestion rate (IR <sub>w</sub> )         | L/day    | 2             | Average time (AT)                           | day         | 10950                                |
| Exposure frequency (EF)                   | day/year | 365           | Reference dose of iodine (RfD) <sup>a</sup> | mg/(kg·day) | Lower limit: 1.3<br>Upper limit: 2.5 |
| Exposure duration (ED)                    | year     | 30            |                                             |             |                                      |

211

<sup>a</sup> Reference dose of iodine is based on recommended iodine intake specified by the World Health Organization.

212 **Supplementary Table 17 | Salt iodization levels in different provinces of China<sup>8</sup>.**

| Province       | Average iodine content (mg/kg) | Iodized salt coverage | Province  | Average iodine content (mg/kg) | Iodized salt coverage |
|----------------|--------------------------------|-----------------------|-----------|--------------------------------|-----------------------|
| Hebei          | 25.0                           | 93.87%                | Ningxia   | 30.0                           | 98.05%                |
| Henan          | 30.0                           | 98.26%                | Hainan    | 25.0                           | 97.77%                |
| Inner Mongolia | 25.0                           | 96.17%                | Hunan     | 30.0                           | 97.35%                |
| Heilongjiang   | 30.0                           | 97.92%                | Sichuan   | 30.0                           | 97.21%                |
| Beijing        | 25.0                           | 95.40%                | Guangxi   | 25.0                           | 99.25%                |
| Shanxi         | 25.0                           | 96.19%                | Jiangxi   | 25.0                           | 99.96%                |
| Liaoning       | 27.5                           | 96.54%                | Guangdong | 25.0                           | 98.14%                |
| Shandong       | 25.0                           | 96.26%                | Hubei     | 25.0                           | 95.97%                |
| Shaanxi        | 25.0                           | 98.27%                | Fujian    | 25.0                           | 90.35%                |
| Jilin          | 25.0                           | 97.66%                | Guizhou   | 30.0                           | 99.62%                |
| Gansu          | 30.0                           | 99.78%                | Yunnan    | 25.0                           | 99.66%                |
| Xinjiang       | 30.0                           | 99.77%                | Chongqing | 30.0                           | 99.08%                |
| Qinghai        | 30.0                           | 99.66%                | Jiangsu   | 25.0                           | 99.13%                |
| Tianjin        | 30.0                           | 79.01%                | Zhejiang  | 25.0                           | 64.24%                |
| Anhui          | 25.0                           | 99.46%                | Shanghai  | 30.0                           | 77.82%                |
| Tibet          | 30.0                           | 97.53%                |           |                                |                       |

213



214 **Supplementary Table 18 | Dietary reference values for iodine.**

| Dietary reference values                           | Value (µg/day) |
|----------------------------------------------------|----------------|
| Recommended nutrient intake of iodine <sup>a</sup> | 150            |
| Tolerable upper iodine intake level <sup>b</sup>   | 600            |

215 <sup>a</sup> Recommended nutrient intake of iodine is provided by the World Health Organization.

216 <sup>b</sup> Tolerable upper iodine intake level is established by the Institute of Medicine.

217 **Supplementary Table 19 | Recommended limits for identifying high iodine groundwater.**

| Recommended limits (RL)      | Value (µg/L) |
|------------------------------|--------------|
| RL <sub>R</sub> <sup>a</sup> | 75           |
| RL <sub>U</sub> <sup>b</sup> | 300          |

218 <sup>a</sup> RL<sub>R</sub> is calculated based on the recommended nutrient intake of iodine (RNI).

219 <sup>b</sup> RL<sub>U</sub> is calculated based on the tolerable upper iodine intake level (UL).

## 220    **Supplementary References**

- 221    1. Fuge, R. & Johnson, C. C. Iodine and human health, the role of environmental  
222        geochemistry and diet, a review. *Appl. Geochem.* **63**, 282-302 (2015).
- 223    2. Li, J. X. et al. Fluoride and iodine enrichment in groundwater of North China Plain:  
224        Evidences from speciation analysis and geochemical modeling. *Sci. Total Environ.* **598**,  
225        239-248 (2017).
- 226    3. Xue, X. B. et al. Impacts of sediment compaction on iodine enrichment in deep aquifers of  
227        the North China Plain. *Water Res.* **159**, 480-489 (2019).
- 228    4. Xue, X. B. et al. Effects of depositional environment and organic matter degradation on the  
229        enrichment and mobilization of iodine in the groundwater of the North China Plain. *Sci.*  
230        *Total Environ.* **686**, 50-62 (2019).
- 231    5. Hou, X. L. et al. A review on speciation of iodine-129 in the environmental and biological  
232        samples. *Anal. Chim. Acta* **632**, 181-196 (2009).
- 233    6. Li, Y. Z. et al. Efficacy and Safety of Long-Term Universal Salt Iodization on Thyroid  
234        Disorders: Epidemiological Evidence from 31 Provinces of Mainland China. *Thyroid* **30**,  
235        568-579 (2020).
- 236    7. National Health Commission of China *Investigation on iodine content in drinking water of*  
237        *China.*

238 <http://www.nhc.gov.cn/jkj/s5874/201905/bb1da1f5e47040e8820b9378e6db4bd3.shtml>  
239 (2019).  
240 8. Chinese Medical Association (Local Epidemiology Branch), Chinese Nutrition Society &  
241 Chinese Society of Endocrinology. *The Iodine Supplementation Guidelines for Chinese*  
242 *Residents*. <http://www.nhc.gov.cn/ewebeditor/uploadfile/2018/05/20180515144010634.pdf>  
243 (2018).
